# Supplementary material for: zUMIs - A fast and flexible pipeline to process RNA sequencing data with UMIs
Source: PubMed Central journal article supplement (PMC6007394; doi:10.1093/gigascience/giy059), 2018-05-26

|                                                      |                                                                                                                                                                                                                                                                                                                                                                                                                                                                                                                                                                                                                                                                                                                                                                                                                                                                                                                                                                                                                                                                                                                                                                                                                                                                                                                    |                      |
|------------------------------------------------------|--------------------------------------------------------------------------------------------------------------------------------------------------------------------------------------------------------------------------------------------------------------------------------------------------------------------------------------------------------------------------------------------------------------------------------------------------------------------------------------------------------------------------------------------------------------------------------------------------------------------------------------------------------------------------------------------------------------------------------------------------------------------------------------------------------------------------------------------------------------------------------------------------------------------------------------------------------------------------------------------------------------------------------------------------------------------------------------------------------------------------------------------------------------------------------------------------------------------------------------------------------------------------------------------------------------------|----------------------|
| <b>Manuscript Number:</b>                            | GIGA-D-17-00271R3                                                                                                                                                                                                                                                                                                                                                                                                                                                                                                                                                                                                                                                                                                                                                                                                                                                                                                                                                                                                                                                                                                                                                                                                                                                                                                  |                      |
| <b>Full Title:</b>                                   | zUMIs - A fast and flexible pipeline to process RNA sequencing data with UMIs                                                                                                                                                                                                                                                                                                                                                                                                                                                                                                                                                                                                                                                                                                                                                                                                                                                                                                                                                                                                                                                                                                                                                                                                                                      |                      |
| <b>Article Type:</b>                                 | Technical Note                                                                                                                                                                                                                                                                                                                                                                                                                                                                                                                                                                                                                                                                                                                                                                                                                                                                                                                                                                                                                                                                                                                                                                                                                                                                                                     |                      |
| <b>Funding Information:</b>                          | Deutsche Forschungsgemeinschaft (SFB1243 - A15)                                                                                                                                                                                                                                                                                                                                                                                                                                                                                                                                                                                                                                                                                                                                                                                                                                                                                                                                                                                                                                                                                                                                                                                                                                                                    | Dr. Ines Hellmann    |
|                                                      | Deutsche Forschungsgemeinschaft (SFB1243 - A14)                                                                                                                                                                                                                                                                                                                                                                                                                                                                                                                                                                                                                                                                                                                                                                                                                                                                                                                                                                                                                                                                                                                                                                                                                                                                    | Prof. Wolfgang Enard |
| <b>Abstract:</b>                                     | <p>Single cell RNA-seq (scRNA-seq) experiments typically analyze hundreds or thousands of cells after amplification of the cDNA. The high throughput is made possible by the early introduction of sample-specific barcodes (BCs) and the amplification bias is alleviated by unique molecular identifiers (UMIs). Thus the ideal analysis pipeline for scRNA-seq data needs to efficiently tabulate reads according to both BC and UMI.</p> <p>zUMIs is such a pipeline, it can handle both known and random BCs and also efficiently collapses UMIs, either just for exon mapping reads or for both exon and intron mapping reads. Another unique feature of zUMIs is the adaptive downsampling function, that facilitates dealing with hugely varying library sizes, but also allows to evaluate whether the library has been sequenced to saturation. zUMIs flexibility allows to accommodate data generated with any of the major scRNA-seq protocols that use BCs and UMIs. To illustrate the utility of zUMIs, we analysed a single-nucleus RNA-seq dataset and show that more than 35% of all reads map to introns. We furthermore show that these intronic reads are informative about expression levels, significantly increasing the number of detected genes and improving the cluster resolution.</p> |                      |
| <b>Corresponding Author:</b>                         | Ines Hellmann<br>Ludwig-Maximilians-Universitat Munchen Fakultat fur Biologie<br>Martinsried, GERMANY                                                                                                                                                                                                                                                                                                                                                                                                                                                                                                                                                                                                                                                                                                                                                                                                                                                                                                                                                                                                                                                                                                                                                                                                              |                      |
| <b>Corresponding Author Secondary Information:</b>   |                                                                                                                                                                                                                                                                                                                                                                                                                                                                                                                                                                                                                                                                                                                                                                                                                                                                                                                                                                                                                                                                                                                                                                                                                                                                                                                    |                      |
| <b>Corresponding Author's Institution:</b>           | Ludwig-Maximilians-Universitat Munchen Fakultat fur Biologie                                                                                                                                                                                                                                                                                                                                                                                                                                                                                                                                                                                                                                                                                                                                                                                                                                                                                                                                                                                                                                                                                                                                                                                                                                                       |                      |
| <b>Corresponding Author's Secondary Institution:</b> |                                                                                                                                                                                                                                                                                                                                                                                                                                                                                                                                                                                                                                                                                                                                                                                                                                                                                                                                                                                                                                                                                                                                                                                                                                                                                                                    |                      |
| <b>First Author:</b>                                 | Swati Parekh                                                                                                                                                                                                                                                                                                                                                                                                                                                                                                                                                                                                                                                                                                                                                                                                                                                                                                                                                                                                                                                                                                                                                                                                                                                                                                       |                      |
| <b>First Author Secondary Information:</b>           |                                                                                                                                                                                                                                                                                                                                                                                                                                                                                                                                                                                                                                                                                                                                                                                                                                                                                                                                                                                                                                                                                                                                                                                                                                                                                                                    |                      |
| <b>Order of Authors:</b>                             | Swati Parekh                                                                                                                                                                                                                                                                                                                                                                                                                                                                                                                                                                                                                                                                                                                                                                                                                                                                                                                                                                                                                                                                                                                                                                                                                                                                                                       |                      |
|                                                      | Christoph Ziegenhain                                                                                                                                                                                                                                                                                                                                                                                                                                                                                                                                                                                                                                                                                                                                                                                                                                                                                                                                                                                                                                                                                                                                                                                                                                                                                               |                      |
|                                                      | Beate Vieth                                                                                                                                                                                                                                                                                                                                                                                                                                                                                                                                                                                                                                                                                                                                                                                                                                                                                                                                                                                                                                                                                                                                                                                                                                                                                                        |                      |
|                                                      | Wolfgang Enard                                                                                                                                                                                                                                                                                                                                                                                                                                                                                                                                                                                                                                                                                                                                                                                                                                                                                                                                                                                                                                                                                                                                                                                                                                                                                                     |                      |
|                                                      | Ines Hellmann                                                                                                                                                                                                                                                                                                                                                                                                                                                                                                                                                                                                                                                                                                                                                                                                                                                                                                                                                                                                                                                                                                                                                                                                                                                                                                      |                      |
| <b>Order of Authors Secondary Information:</b>       |                                                                                                                                                                                                                                                                                                                                                                                                                                                                                                                                                                                                                                                                                                                                                                                                                                                                                                                                                                                                                                                                                                                                                                                                                                                                                                                    |                      |
| <b>Response to Reviewers:</b>                        | <p>In order to increase readability, we have included only the remaining questions of the reviewer</p> <p>***</p> <p>REVIEWER RESPONSE 2:<br/>Please clarify "all detected genes". Is this all genes detected in Exon or Exon+Intron? If including all detected genes, then why are there different numbers of genes in each quantile in Figure 4H (top panel)? By definition, a quantile bin should contain roughly equal numbers of observations, but this does not seem to be the case even if the</p>                                                                                                                                                                                                                                                                                                                                                                                                                                                                                                                                                                                                                                                                                                                                                                                                          |                      |

|                                                                                                                                                                                                                                                                                                  |                                                                                                                                                                                                                                                                                                                                                                                                                                                                                                                                                                                                                                                                                                                                                                                                                                                                                                                                                                                                                                                                                                                                                                                                                                                                                                                                                                                                                                                                                                                                                                                                                                                                                                                                                          |
|--------------------------------------------------------------------------------------------------------------------------------------------------------------------------------------------------------------------------------------------------------------------------------------------------|----------------------------------------------------------------------------------------------------------------------------------------------------------------------------------------------------------------------------------------------------------------------------------------------------------------------------------------------------------------------------------------------------------------------------------------------------------------------------------------------------------------------------------------------------------------------------------------------------------------------------------------------------------------------------------------------------------------------------------------------------------------------------------------------------------------------------------------------------------------------------------------------------------------------------------------------------------------------------------------------------------------------------------------------------------------------------------------------------------------------------------------------------------------------------------------------------------------------------------------------------------------------------------------------------------------------------------------------------------------------------------------------------------------------------------------------------------------------------------------------------------------------------------------------------------------------------------------------------------------------------------------------------------------------------------------------------------------------------------------------------------|
|                                                                                                                                                                                                                                                                                                  | <p>quantiles were defined on the Exon+Intron data (the larger quantile bins have more genes for Exon+Intron).<br/>***</p> <p>---</p> <p>Author response:<br/>We have amended the text to clarify this point as requested.<br/>"For a fair comparison, we include all detected genes, which is equivalent to the number of genes detected with Exon+Intron counting and since we call a gene detected as soon as one count is associated, Exon counting is necessarily a subset of Exon+Intron."<br/>---</p> <p>***</p> <p>REVIEWER RESPONSE 2:<br/>Thanks for the clarification regarding enrichment of marker genes as opposed to simply detecting more genes in general. I appreciate the explanation given by the paragraph in the authors' response beginning with "Concerning the additionally detected marker genes:...". It would be transparent to include this explanation in the manuscript, since as it reads currently, it seems to imply an enrichment for marker genes when including introns.<br/>***</p> <p>---</p> <p>Author response:<br/>We agree with making the explanation as transparent as possible and have amended the text in this regard.<br/>"Here, we cross-reference the gene list with marker genes for transcriptomic subtypes detected for major cell types of the mouse brain and find that ~5% of the additional genes are also marker genes, which corresponds well to the general frequency of marker genes among the detected genes (4%). In the same vein, we also detect proportionally more DE genes with Exon+Intron counting as compared to Exon counting. Thus including introns simply allows us to better detect present transcripts, while it leaves the proportions of interest unaltered."<br/>---</p> |
| <b>Additional Information:</b>                                                                                                                                                                                                                                                                   |                                                                                                                                                                                                                                                                                                                                                                                                                                                                                                                                                                                                                                                                                                                                                                                                                                                                                                                                                                                                                                                                                                                                                                                                                                                                                                                                                                                                                                                                                                                                                                                                                                                                                                                                                          |
| <b>Question</b>                                                                                                                                                                                                                                                                                  | <b>Response</b>                                                                                                                                                                                                                                                                                                                                                                                                                                                                                                                                                                                                                                                                                                                                                                                                                                                                                                                                                                                                                                                                                                                                                                                                                                                                                                                                                                                                                                                                                                                                                                                                                                                                                                                                          |
| Are you submitting this manuscript to a special series or article collection?                                                                                                                                                                                                                    | No                                                                                                                                                                                                                                                                                                                                                                                                                                                                                                                                                                                                                                                                                                                                                                                                                                                                                                                                                                                                                                                                                                                                                                                                                                                                                                                                                                                                                                                                                                                                                                                                                                                                                                                                                       |
| <b>Experimental design and statistics</b>                                                                                                                                                                                                                                                        | Yes                                                                                                                                                                                                                                                                                                                                                                                                                                                                                                                                                                                                                                                                                                                                                                                                                                                                                                                                                                                                                                                                                                                                                                                                                                                                                                                                                                                                                                                                                                                                                                                                                                                                                                                                                      |
| Full details of the experimental design and statistical methods used should be given in the Methods section, as detailed in our <a href="#">Minimum Standards Reporting Checklist</a> . Information essential to interpreting the data presented should be made available in the figure legends. |                                                                                                                                                                                                                                                                                                                                                                                                                                                                                                                                                                                                                                                                                                                                                                                                                                                                                                                                                                                                                                                                                                                                                                                                                                                                                                                                                                                                                                                                                                                                                                                                                                                                                                                                                          |
| Have you included all the information requested in your manuscript?                                                                                                                                                                                                                              |                                                                                                                                                                                                                                                                                                                                                                                                                                                                                                                                                                                                                                                                                                                                                                                                                                                                                                                                                                                                                                                                                                                                                                                                                                                                                                                                                                                                                                                                                                                                                                                                                                                                                                                                                          |
| <b>Resources</b>                                                                                                                                                                                                                                                                                 | Yes                                                                                                                                                                                                                                                                                                                                                                                                                                                                                                                                                                                                                                                                                                                                                                                                                                                                                                                                                                                                                                                                                                                                                                                                                                                                                                                                                                                                                                                                                                                                                                                                                                                                                                                                                      |
| A description of all resources used, including antibodies, cell lines, animals and software tools, with enough                                                                                                                                                                                   |                                                                                                                                                                                                                                                                                                                                                                                                                                                                                                                                                                                                                                                                                                                                                                                                                                                                                                                                                                                                                                                                                                                                                                                                                                                                                                                                                                                                                                                                                                                                                                                                                                                                                                                                                          |

|                                                                                                                                                                                                                                                                                                                                                                                                                                                                                                                                                         |            |
|---------------------------------------------------------------------------------------------------------------------------------------------------------------------------------------------------------------------------------------------------------------------------------------------------------------------------------------------------------------------------------------------------------------------------------------------------------------------------------------------------------------------------------------------------------|------------|
| <p>information to allow them to be uniquely identified, should be included in the Methods section. Authors are strongly encouraged to cite <a href="#">Research Resource Identifiers</a> (RRIDs) for antibodies, model organisms and tools, where possible.</p> <p>Have you included the information requested as detailed in our <a href="#">Minimum Standards Reporting Checklist</a>?</p>                                                                                                                                                            |            |
| <p><b>Availability of data and materials</b></p> <p>All datasets and code on which the conclusions of the paper rely must be either included in your submission or deposited in <a href="#">publicly available repositories</a> (where available and ethically appropriate), referencing such data using a unique identifier in the references and in the “Availability of Data and Materials” section of your manuscript.</p> <p>Have you have met the above requirement as detailed in our <a href="#">Minimum Standards Reporting Checklist</a>?</p> | <p>Yes</p> |

```
1
2
3
4 This is pdfTeX, Version 3.14159265-2.6-1.40.16 (TeX Live 2015/W32TeX)
5 (preloaded format=pdflatex 2016.4.6)  22 APR 2018 10:20
6 entering extended mode
7   restricted \writel8 enabled.
8   %&-line parsing enabled.
9 **./main.tex
10  (./main.tex
11  LaTeX2e <2016/03/31>
12  Babel <3.9q> and hyphenation patterns for 81 language(s) loaded.
13  (./oup-contemporary.cls
14  Document Class: oup-contemporary 2017/06/28, v1.1
15  (c:/TeXLive/2015/texmf-dist/tex/latex/base/article.cls
16  Document Class: article 2014/09/29 v1.4h Standard LaTeX document class
17  (c:/TeXLive/2015/texmf-dist/tex/latex/base/size10.clo
18  File: size10.clo 2014/09/29 v1.4h Standard LaTeX file (size option)
19  )
20  \c@part=\count79
21  \c@section=\count80
22  \c@subsection=\count81
23  \c@subsubsection=\count82
24  \c@paragraph=\count83
25  \c@subparagraph=\count84
26  \c@figure=\count85
27  \c@table=\count86
28  \abovecaptionskip=\skip41
29  \belowcaptionskip=\skip42
30  \bibindent=\dimen102
31  ) (c:/TeXLive/2015/texmf-dist/tex/latex/base/inputenc.sty
32  Package: inputenc 2015/03/17 v1.2c Input encoding file
33  \inpenc@prehook=\toks14
34  \inpenc@posthook=\toks15
35  (c:/TeXLive/2015/texmf-dist/tex/latex/base/utf8.def
36  File: utf8.def 2016/02/28 v1.1s UTF-8 support for inputenc
37  Now handling font encoding OML ...
38  ... no UTF-8 mapping file for font encoding OML
39  Now handling font encoding T1 ...
40  ... processing UTF-8 mapping file for font encoding T1
41  (c:/TeXLive/2015/texmf-dist/tex/latex/base/tlenc.dfu
42  File: tlenc.dfu 2016/02/28 v1.1s UTF-8 support for inputenc
43  defining Unicode char U+00A0 (decimal 160)
44  defining Unicode char U+00A1 (decimal 161)
45  defining Unicode char U+00A3 (decimal 163)
46  defining Unicode char U+00AB (decimal 171)
47  defining Unicode char U+00AD (decimal 173)
48  defining Unicode char U+00BB (decimal 187)
49  defining Unicode char U+00BF (decimal 191)
50  defining Unicode char U+00C0 (decimal 192)
51  defining Unicode char U+00C1 (decimal 193)
52  defining Unicode char U+00C2 (decimal 194)
53  defining Unicode char U+00C3 (decimal 195)
54  defining Unicode char U+00C4 (decimal 196)
55  defining Unicode char U+00C5 (decimal 197)
56  defining Unicode char U+00C6 (decimal 198)
57  defining Unicode char U+00C7 (decimal 199)
58
59
60
61
62
63
64
65
```

1  
2  
3  
4 defining Unicode char U+00C8 (decimal 200)  
5 defining Unicode char U+00C9 (decimal 201)  
6 defining Unicode char U+00CA (decimal 202)  
7 defining Unicode char U+00CB (decimal 203)  
8 defining Unicode char U+00CC (decimal 204)  
9 defining Unicode char U+00CD (decimal 205)  
10 defining Unicode char U+00CE (decimal 206)  
11 defining Unicode char U+00CF (decimal 207)  
12 defining Unicode char U+00D0 (decimal 208)  
13 defining Unicode char U+00D1 (decimal 209)  
14 defining Unicode char U+00D2 (decimal 210)  
15 defining Unicode char U+00D3 (decimal 211)  
16 defining Unicode char U+00D4 (decimal 212)  
17 defining Unicode char U+00D5 (decimal 213)  
18 defining Unicode char U+00D6 (decimal 214)  
19 defining Unicode char U+00D8 (decimal 216)  
20 defining Unicode char U+00D9 (decimal 217)  
21 defining Unicode char U+00DA (decimal 218)  
22 defining Unicode char U+00DB (decimal 219)  
23 defining Unicode char U+00DC (decimal 220)  
24 defining Unicode char U+00DD (decimal 221)  
25 defining Unicode char U+00DE (decimal 222)  
26 defining Unicode char U+00DF (decimal 223)  
27 defining Unicode char U+00E0 (decimal 224)  
28 defining Unicode char U+00E1 (decimal 225)  
29 defining Unicode char U+00E2 (decimal 226)  
30 defining Unicode char U+00E3 (decimal 227)  
31 defining Unicode char U+00E4 (decimal 228)  
32 defining Unicode char U+00E5 (decimal 229)  
33 defining Unicode char U+00E6 (decimal 230)  
34 defining Unicode char U+00E7 (decimal 231)  
35 defining Unicode char U+00E8 (decimal 232)  
36 defining Unicode char U+00E9 (decimal 233)  
37 defining Unicode char U+00EA (decimal 234)  
38 defining Unicode char U+00EB (decimal 235)  
39 defining Unicode char U+00EC (decimal 236)  
40 defining Unicode char U+00ED (decimal 237)  
41 defining Unicode char U+00EE (decimal 238)  
42 defining Unicode char U+00EF (decimal 239)  
43 defining Unicode char U+00F0 (decimal 240)  
44 defining Unicode char U+00F1 (decimal 241)  
45 defining Unicode char U+00F2 (decimal 242)  
46 defining Unicode char U+00F3 (decimal 243)  
47 defining Unicode char U+00F4 (decimal 244)  
48 defining Unicode char U+00F5 (decimal 245)  
49 defining Unicode char U+00F6 (decimal 246)  
50 defining Unicode char U+00F8 (decimal 248)  
51 defining Unicode char U+00F9 (decimal 249)  
52 defining Unicode char U+00FA (decimal 250)  
53 defining Unicode char U+00FB (decimal 251)  
54 defining Unicode char U+00FC (decimal 252)  
55 defining Unicode char U+00FD (decimal 253)  
56 defining Unicode char U+00FE (decimal 254)  
57 defining Unicode char U+00FF (decimal 255)  
58  
59  
60  
61  
62  
63  
64  
65

1  
2  
3  
4 defining Unicode char U+0100 (decimal 256)  
5 defining Unicode char U+0101 (decimal 257)  
6 defining Unicode char U+0102 (decimal 258)  
7 defining Unicode char U+0103 (decimal 259)  
8 defining Unicode char U+0104 (decimal 260)  
9 defining Unicode char U+0105 (decimal 261)  
10 defining Unicode char U+0106 (decimal 262)  
11 defining Unicode char U+0107 (decimal 263)  
12 defining Unicode char U+0108 (decimal 264)  
13 defining Unicode char U+0109 (decimal 265)  
14 defining Unicode char U+010A (decimal 266)  
15 defining Unicode char U+010B (decimal 267)  
16 defining Unicode char U+010C (decimal 268)  
17 defining Unicode char U+010D (decimal 269)  
18 defining Unicode char U+010E (decimal 270)  
19 defining Unicode char U+010F (decimal 271)  
20 defining Unicode char U+0110 (decimal 272)  
21 defining Unicode char U+0111 (decimal 273)  
22 defining Unicode char U+0112 (decimal 274)  
23 defining Unicode char U+0113 (decimal 275)  
24 defining Unicode char U+0114 (decimal 276)  
25 defining Unicode char U+0115 (decimal 277)  
26 defining Unicode char U+0116 (decimal 278)  
27 defining Unicode char U+0117 (decimal 279)  
28 defining Unicode char U+0118 (decimal 280)  
29 defining Unicode char U+0119 (decimal 281)  
30 defining Unicode char U+011A (decimal 282)  
31 defining Unicode char U+011B (decimal 283)  
32 defining Unicode char U+011C (decimal 284)  
33 defining Unicode char U+011D (decimal 285)  
34 defining Unicode char U+011E (decimal 286)  
35 defining Unicode char U+011F (decimal 287)  
36 defining Unicode char U+0120 (decimal 288)  
37 defining Unicode char U+0121 (decimal 289)  
38 defining Unicode char U+0122 (decimal 290)  
39 defining Unicode char U+0123 (decimal 291)  
40 defining Unicode char U+0124 (decimal 292)  
41 defining Unicode char U+0125 (decimal 293)  
42 defining Unicode char U+0128 (decimal 296)  
43 defining Unicode char U+0129 (decimal 297)  
44 defining Unicode char U+012A (decimal 298)  
45 defining Unicode char U+012B (decimal 299)  
46 defining Unicode char U+012C (decimal 300)  
47 defining Unicode char U+012D (decimal 301)  
48 defining Unicode char U+012E (decimal 302)  
49 defining Unicode char U+012F (decimal 303)  
50 defining Unicode char U+0130 (decimal 304)  
51 defining Unicode char U+0131 (decimal 305)  
52 defining Unicode char U+0132 (decimal 306)  
53 defining Unicode char U+0133 (decimal 307)  
54 defining Unicode char U+0134 (decimal 308)  
55 defining Unicode char U+0135 (decimal 309)  
56 defining Unicode char U+0136 (decimal 310)  
57 defining Unicode char U+0137 (decimal 311)  
61  
62  
63  
64  
65

1  
2  
3  
4 defining Unicode char U+0139 (decimal 313)  
5 defining Unicode char U+013A (decimal 314)  
6 defining Unicode char U+013B (decimal 315)  
7 defining Unicode char U+013C (decimal 316)  
8 defining Unicode char U+013D (decimal 317)  
9 defining Unicode char U+013E (decimal 318)  
10 defining Unicode char U+0141 (decimal 321)  
11 defining Unicode char U+0142 (decimal 322)  
12 defining Unicode char U+0143 (decimal 323)  
13 defining Unicode char U+0144 (decimal 324)  
14 defining Unicode char U+0145 (decimal 325)  
15 defining Unicode char U+0146 (decimal 326)  
16 defining Unicode char U+0147 (decimal 327)  
17 defining Unicode char U+0148 (decimal 328)  
18 defining Unicode char U+014A (decimal 330)  
19 defining Unicode char U+014B (decimal 331)  
20 defining Unicode char U+014C (decimal 332)  
21 defining Unicode char U+014D (decimal 333)  
22 defining Unicode char U+014E (decimal 334)  
23 defining Unicode char U+014F (decimal 335)  
24 defining Unicode char U+0150 (decimal 336)  
25 defining Unicode char U+0151 (decimal 337)  
26 defining Unicode char U+0152 (decimal 338)  
27 defining Unicode char U+0153 (decimal 339)  
28 defining Unicode char U+0154 (decimal 340)  
29 defining Unicode char U+0155 (decimal 341)  
30 defining Unicode char U+0156 (decimal 342)  
31 defining Unicode char U+0157 (decimal 343)  
32 defining Unicode char U+0158 (decimal 344)  
33 defining Unicode char U+0159 (decimal 345)  
34 defining Unicode char U+015A (decimal 346)  
35 defining Unicode char U+015B (decimal 347)  
36 defining Unicode char U+015C (decimal 348)  
37 defining Unicode char U+015D (decimal 349)  
38 defining Unicode char U+015E (decimal 350)  
39 defining Unicode char U+015F (decimal 351)  
40 defining Unicode char U+0160 (decimal 352)  
41 defining Unicode char U+0161 (decimal 353)  
42 defining Unicode char U+0162 (decimal 354)  
43 defining Unicode char U+0163 (decimal 355)  
44 defining Unicode char U+0164 (decimal 356)  
45 defining Unicode char U+0165 (decimal 357)  
46 defining Unicode char U+0168 (decimal 360)  
47 defining Unicode char U+0169 (decimal 361)  
48 defining Unicode char U+016A (decimal 362)  
49 defining Unicode char U+016B (decimal 363)  
50 defining Unicode char U+016C (decimal 364)  
51 defining Unicode char U+016D (decimal 365)  
52 defining Unicode char U+016E (decimal 366)  
53 defining Unicode char U+016F (decimal 367)  
54 defining Unicode char U+0170 (decimal 368)  
55 defining Unicode char U+0171 (decimal 369)  
56 defining Unicode char U+0172 (decimal 370)  
57 defining Unicode char U+0173 (decimal 371)  
58  
59  
60  
61  
62  
63  
64  
65

1  
2  
3  
4 defining Unicode char U+0174 (decimal 372)  
5 defining Unicode char U+0175 (decimal 373)  
6 defining Unicode char U+0176 (decimal 374)  
7 defining Unicode char U+0177 (decimal 375)  
8 defining Unicode char U+0178 (decimal 376)  
9 defining Unicode char U+0179 (decimal 377)  
10 defining Unicode char U+017A (decimal 378)  
11 defining Unicode char U+017B (decimal 379)  
12 defining Unicode char U+017C (decimal 380)  
13 defining Unicode char U+017D (decimal 381)  
14 defining Unicode char U+017E (decimal 382)  
15 defining Unicode char U+01CD (decimal 461)  
16 defining Unicode char U+01CE (decimal 462)  
17 defining Unicode char U+01CF (decimal 463)  
18 defining Unicode char U+01D0 (decimal 464)  
19 defining Unicode char U+01D1 (decimal 465)  
20 defining Unicode char U+01D2 (decimal 466)  
21 defining Unicode char U+01D3 (decimal 467)  
22 defining Unicode char U+01D4 (decimal 468)  
23 defining Unicode char U+01E2 (decimal 482)  
24 defining Unicode char U+01E3 (decimal 483)  
25 defining Unicode char U+01E6 (decimal 486)  
26 defining Unicode char U+01E7 (decimal 487)  
27 defining Unicode char U+01E8 (decimal 488)  
28 defining Unicode char U+01E9 (decimal 489)  
29 defining Unicode char U+01EA (decimal 490)  
30 defining Unicode char U+01EB (decimal 491)  
31 defining Unicode char U+01F0 (decimal 496)  
32 defining Unicode char U+01F4 (decimal 500)  
33 defining Unicode char U+01F5 (decimal 501)  
34 defining Unicode char U+0218 (decimal 536)  
35 defining Unicode char U+0219 (decimal 537)  
36 defining Unicode char U+021A (decimal 538)  
37 defining Unicode char U+021B (decimal 539)  
38 defining Unicode char U+1E02 (decimal 7682)  
39 defining Unicode char U+1E03 (decimal 7683)  
40 defining Unicode char U+200C (decimal 8204)  
41 defining Unicode char U+2010 (decimal 8208)  
42 defining Unicode char U+2011 (decimal 8209)  
43 defining Unicode char U+2012 (decimal 8210)  
44 defining Unicode char U+2013 (decimal 8211)  
45 defining Unicode char U+2014 (decimal 8212)  
46 defining Unicode char U+2015 (decimal 8213)  
47 defining Unicode char U+2018 (decimal 8216)  
48 defining Unicode char U+2019 (decimal 8217)  
49 defining Unicode char U+201A (decimal 8218)  
50 defining Unicode char U+201C (decimal 8220)  
51 defining Unicode char U+201D (decimal 8221)  
52 defining Unicode char U+201E (decimal 8222)  
53 defining Unicode char U+2030 (decimal 8240)  
54 defining Unicode char U+2031 (decimal 8241)  
55 defining Unicode char U+2039 (decimal 8249)  
56 defining Unicode char U+203A (decimal 8250)  
57 defining Unicode char U+2423 (decimal 9251)  
58  
59  
60  
61  
62  
63  
64  
65



```
1
2
3
4 )
5 Now handling font encoding OT1 ...
6 ... processing UTF-8 mapping file for font encoding OT1
7 (c:/TeXLive/2015/texmf-dist/tex/latex/base/otlenc.dfu
8 File: otlenc.dfu 2016/02/28 v1.1s UTF-8 support for inputenc
9     defining Unicode char U+00A0 (decimal 160)
10    defining Unicode char U+00A1 (decimal 161)
11    defining Unicode char U+00A3 (decimal 163)
12    defining Unicode char U+00AD (decimal 173)
13    defining Unicode char U+00B8 (decimal 184)
14    defining Unicode char U+00BF (decimal 191)
15    defining Unicode char U+00C5 (decimal 197)
16    defining Unicode char U+00C6 (decimal 198)
17    defining Unicode char U+00D8 (decimal 216)
18    defining Unicode char U+00DF (decimal 223)
19    defining Unicode char U+00E6 (decimal 230)
20    defining Unicode char U+00EC (decimal 236)
21    defining Unicode char U+00ED (decimal 237)
22    defining Unicode char U+00EE (decimal 238)
23    defining Unicode char U+00EF (decimal 239)
24    defining Unicode char U+00F8 (decimal 248)
25    defining Unicode char U+0131 (decimal 305)
26    defining Unicode char U+0141 (decimal 321)
27    defining Unicode char U+0142 (decimal 322)
28    defining Unicode char U+0152 (decimal 338)
29    defining Unicode char U+0153 (decimal 339)
30    defining Unicode char U+0174 (decimal 372)
31    defining Unicode char U+0175 (decimal 373)
32    defining Unicode char U+0176 (decimal 374)
33    defining Unicode char U+0177 (decimal 375)
34    defining Unicode char U+0218 (decimal 536)
35    defining Unicode char U+0219 (decimal 537)
36    defining Unicode char U+021A (decimal 538)
37    defining Unicode char U+021B (decimal 539)
38    defining Unicode char U+2013 (decimal 8211)
39    defining Unicode char U+2014 (decimal 8212)
40    defining Unicode char U+2018 (decimal 8216)
41    defining Unicode char U+2019 (decimal 8217)
42    defining Unicode char U+201C (decimal 8220)
43    defining Unicode char U+201D (decimal 8221)
44
45 )
46
47 Now handling font encoding OMS ...
48 ... processing UTF-8 mapping file for font encoding OMS
49 (c:/TeXLive/2015/texmf-dist/tex/latex/base/omsenc.dfu
50 File: omsenc.dfu 2016/02/28 v1.1s UTF-8 support for inputenc
51     defining Unicode char U+00A7 (decimal 167)
52     defining Unicode char U+00B6 (decimal 182)
53     defining Unicode char U+00B7 (decimal 183)
54     defining Unicode char U+2020 (decimal 8224)
55     defining Unicode char U+2021 (decimal 8225)
56     defining Unicode char U+2022 (decimal 8226)
57
58 )
59 Now handling font encoding OMX ...
60 ... no UTF-8 mapping file for font encoding OMX
61
62
63
64
65
```

```
1
2
3
4 Now handling font encoding U ...
5 ... no UTF-8 mapping file for font encoding U
6   defining Unicode char U+00A9 (decimal 169)
7   defining Unicode char U+00AA (decimal 170)
8   defining Unicode char U+00AE (decimal 174)
9   defining Unicode char U+00BA (decimal 186)
10  defining Unicode char U+02C6 (decimal 710)
11  defining Unicode char U+02DC (decimal 732)
12  defining Unicode char U+200C (decimal 8204)
13  defining Unicode char U+2026 (decimal 8230)
14  defining Unicode char U+2122 (decimal 8482)
15  defining Unicode char U+2423 (decimal 9251)
16
17 )) (c:/TeXLive/2015/texmf-dist/tex/latex/base/fontenc.sty
18 Package: fontenc 2005/09/27 v1.99g Standard LaTeX package
19 (c:/TeXLive/2015/texmf-dist/tex/latex/base/tlenc.def
20 File: tlenc.def 2005/09/27 v1.99g Standard LaTeX file
21 LaTeX Font Info:   Redeclaring font encoding T1 on input line 48.
22 )) (c:/TeXLive/2015/texmf-dist/tex/generic/oberdiek/ifpdf.sty
23 Package: ifpdf 2011/01/30 v2.3 Provides the ifpdf switch (HO)
24 Package ifpdf Info: pdfTeX in PDF mode is detected.
25 ) (c:/TeXLive/2015/texmf-dist/tex/latex/microtype/microtype.sty
26 Package: microtype 2013/05/23 v2.5a Micro-typographical refinements (RS)
27 (c:/TeXLive/2015/texmf-dist/tex/latex/graphics/keyval.sty
28 Package: keyval 2014/10/28 v1.15 key=value parser (DPC)
29 \KV@toks@=\toks16
30 )
31 \MT@toks=\toks17
32 \MT@count=\count87
33 LaTeX Info: Redefining \textls on input line 766.
34 \MT@outer@kern=\dimen103
35 LaTeX Info: Redefining \textmicrotypecontext on input line 1285.
36 \MT@listname@count=\count88
37 (c:/TeXLive/2015/texmf-dist/tex/latex/microtype/microtype-pdftex.def
38 File: microtype-pdftex.def 2013/05/23 v2.5a Definitions specific to
39 pdftex (RS)
40
41 LaTeX Info: Redefining \lsstyle on input line 915.
42 LaTeX Info: Redefining \slig on input line 915.
43 \MT@outer@space=\skip43
44 )
45 Package microtype Info: Loading configuration file microtype.cfg.
46 (c:/TeXLive/2015/texmf-dist/tex/latex/microtype/microtype.cfg
47 File: microtype.cfg 2013/05/23 v2.5a microtype main configuration file
48 (RS)
49 )) (c:/TeXLive/2015/texmf-dist/tex/latex/euler/euler.sty
50 Package: euler 1995/03/05 v2.5
51 Package: `euler' v2.5 <1995/03/05> (FJ and FMi)
52 LaTeX Font Info:   Redeclaring symbol font `letters' on input line 35.
53 LaTeX Font Info:   Encoding `OML' has changed to `U' for symbol font
54 (Font)             `letters' in the math version `normal' on input line
55 35.
56 LaTeX Font Info:   Overwriting symbol font `letters' in version `normal'
57 (Font)             OML/cmm/m/it --> U/eur/m/n on input line 35.
58 LaTeX Font Info:   Encoding `OML' has changed to `U' for symbol font
59
60
61
62
63
64
65
```

1  
2  
3  
4 (Font) 'letters' in the math version 'bold' on input line  
5 35.  
6 LaTeX Font Info: Overwriting symbol font 'letters' in version 'bold'  
7 (Font) OML/cmm/b/it --> U/eur/m/n on input line 35.  
8 LaTeX Font Info: Overwriting symbol font 'letters' in version 'bold'  
9 (Font) U/eur/m/n --> U/eur/b/n on input line 36.  
10 LaTeX Font Info: Redefining math symbol \Gamma on input line 47.  
11 LaTeX Font Info: Redefining math symbol \Delta on input line 48.  
12 LaTeX Font Info: Redefining math symbol \Theta on input line 49.  
13 LaTeX Font Info: Redefining math symbol \Lambda on input line 50.  
14 LaTeX Font Info: Redefining math symbol \Xi on input line 51.  
15 LaTeX Font Info: Redefining math symbol \Pi on input line 52.  
16 LaTeX Font Info: Redefining math symbol \Sigma on input line 53.  
17 LaTeX Font Info: Redefining math symbol \Upsilon on input line 54.  
18 LaTeX Font Info: Redefining math symbol \Phi on input line 55.  
19 LaTeX Font Info: Redefining math symbol \Psi on input line 56.  
20 LaTeX Font Info: Redefining math symbol \Omega on input line 57.  
21 LaTeX Font Info: Redefining math symbol \Omega on input line 57.  
22 \symEulerFraktur=\mathgroup4  
23 LaTeX Font Info: Overwriting symbol font 'EulerFraktur' in version  
24 'bold'  
25 (Font) U/euf/m/n --> U/euf/b/n on input line 63.  
26 LaTeX Info: Redefining \oldstylenums on input line 85.  
27 \symEulerScript=\mathgroup5  
28 LaTeX Font Info: Overwriting symbol font 'EulerScript' in version  
29 'bold'  
30 (Font) U/eus/m/n --> U/eus/b/n on input line 93.  
31 LaTeX Font Info: Redefining math symbol \aleph on input line 97.  
32 LaTeX Font Info: Redefining math symbol \Re on input line 98.  
33 LaTeX Font Info: Redefining math symbol \Im on input line 99.  
34 LaTeX Font Info: Redefining math delimiter \vert on input line 101.  
35 LaTeX Font Info: Redefining math delimiter \backslash on input line  
36 103.  
37 LaTeX Font Info: Redefining math symbol \neg on input line 106.  
38 LaTeX Font Info: Redefining math symbol \wedge on input line 108.  
39 LaTeX Font Info: Redefining math symbol \vee on input line 110.  
40 LaTeX Font Info: Redefining math symbol \setminus on input line 112.  
41 LaTeX Font Info: Redefining math symbol \sim on input line 113.  
42 LaTeX Font Info: Redefining math symbol \mid on input line 114.  
43 LaTeX Font Info: Redefining math delimiter \arrowvert on input line  
44 116.  
45 LaTeX Font Info: Redefining math symbol \mathsection on input line  
46 117.  
47 \symEulerExtension=\mathgroup6  
48 LaTeX Font Info: Redefining math symbol \coprod on input line 125.  
49 LaTeX Font Info: Redefining math symbol \prod on input line 125.  
50 LaTeX Font Info: Redefining math symbol \sum on input line 125.  
51 LaTeX Font Info: Redefining math symbol \intop on input line 130.  
52 LaTeX Font Info: Redefining math symbol \ointop on input line 131.  
53 LaTeX Font Info: Redefining math symbol \bracedl on input line 132.  
54 LaTeX Font Info: Redefining math symbol \bracerd on input line 133.  
55 LaTeX Font Info: Redefining math symbol \bracelu on input line 134.  
56 LaTeX Font Info: Redefining math symbol \braceru on input line 135.  
57 LaTeX Font Info: Redefining math symbol \infty on input line 136.  
58 LaTeX Font Info: Redefining math symbol \nearrow on input line 153.  
59  
60  
61  
62  
63  
64  
65

1  
2  
3  
4 LaTeX Font Info: Redeclaring math symbol \searrow on input line 154.  
5 LaTeX Font Info: Redeclaring math symbol \nwarrow on input line 155.  
6 LaTeX Font Info: Redeclaring math symbol \swarrow on input line 156.  
7 LaTeX Font Info: Redeclaring math symbol \Leftrightarrow on input line  
8 157.  
9 LaTeX Font Info: Redeclaring math symbol \Leftarrow on input line 158.  
10 LaTeX Font Info: Redeclaring math symbol \rightarrow on input line  
11 159.  
12 LaTeX Font Info: Redeclaring math symbol \leftrightharrow on input line  
13 160.  
14 LaTeX Font Info: Redeclaring math symbol \leftarrow on input line 161.  
15 LaTeX Font Info: Redeclaring math symbol \rightarrow on input line  
16 163.  
17 LaTeX Font Info: Redeclaring math delimiter \uparrow on input line  
18 166.  
19 LaTeX Font Info: Redeclaring math delimiter \downarrow on input line  
20 168.  
21 LaTeX Font Info: Redeclaring math delimiter \updownarrow on input line  
22 170.  
23 LaTeX Font Info: Redeclaring math delimiter \Uparrow on input line  
24 172.  
25 LaTeX Font Info: Redeclaring math delimiter \Downarrow on input line  
26 174.  
27 LaTeX Font Info: Redeclaring math delimiter \Updownarrow on input line  
28 176.  
29 LaTeX Font Info: Redeclaring math symbol \leftharpoonup on input line  
30 177.  
31 LaTeX Font Info: Redeclaring math symbol \leftharpoondown on input  
32 line 178.  
33  
34  
35 LaTeX Font Info: Redeclaring math symbol \rightharpoonup on input line  
36 179.  
37 LaTeX Font Info: Redeclaring math symbol \rightharpoondown on input  
38 line 180  
39  
40 .  
41 LaTeX Font Info: Redeclaring math delimiter \lbrace on input line 182.  
42 LaTeX Font Info: Redeclaring math delimiter \rbrace on input line 184.  
43 \symcmmigroup=\mathgroup7  
44 LaTeX Font Info: Overwriting symbol font `cmmigroup' in version `bold'  
45 (Font) OML/cmm/m/it --> OML/cmm/b/it on input line 200.  
46 LaTeX Font Info: Redeclaring math accent \vec on input line 201.  
47 LaTeX Font Info: Redeclaring math symbol \triangleleft on input line  
48 202.  
49 LaTeX Font Info: Redeclaring math symbol \triangleright on input line  
50 203.  
51 LaTeX Font Info: Redeclaring math symbol \star on input line 204.  
52 LaTeX Font Info: Redeclaring math symbol \lhook on input line 205.  
53 LaTeX Font Info: Redeclaring math symbol \rhook on input line 206.  
54 LaTeX Font Info: Redeclaring math symbol \flat on input line 207.  
55 LaTeX Font Info: Redeclaring math symbol \natural on input line 208.  
56 LaTeX Font Info: Redeclaring math symbol \sharp on input line 209.  
57 LaTeX Font Info: Redeclaring math symbol \smile on input line 210.  
58 LaTeX Font Info: Redeclaring math symbol \frown on input line 211.  
59 LaTeX Font Info: Redeclaring math accent \grave on input line 245.  
60  
61  
62  
63  
64  
65

```
1
2
3
4 LaTeX Font Info: Redefining math accent \acute on input line 246.
5 LaTeX Font Info: Redefining math accent \tilde on input line 247.
6 LaTeX Font Info: Redefining math accent \ddot on input line 248.
7 LaTeX Font Info: Redefining math accent \check on input line 249.
8 LaTeX Font Info: Redefining math accent \breve on input line 250.
9 LaTeX Font Info: Redefining math accent \bar on input line 251.
10 LaTeX Font Info: Redefining math accent \dot on input line 252.
11 LaTeX Font Info: Redefining math accent \hat on input line 254.
12 ) (c:/TeXLive/2015/texmf-dist/tex/latex/merriweather/merriweather.sty
13 Package: merriweather 2014/01/22 (Bob Tennent) Supports
14 Merriweather(Sans) font
15 s for all LaTeX engines.
16 (c:/TeXLive/2015/texmf-dist/tex/generic/ifxetex/ifxetex.sty
17 Package: ifxetex 2010/09/12 v0.6 Provides ifxetex conditional
18 ) (c:/TeXLive/2015/texmf-dist/tex/generic/oberdiek/ifluatex.sty
19 Package: ifluatex 2010/03/01 v1.3 Provides the ifluatex switch (HO)
20 Package ifluatex Info: LuaTeX not detected.
21 ) (c:/TeXLive/2015/texmf-dist/tex/latex/base/textcomp.sty
22 Package: textcomp 2005/09/27 v1.99g Standard LaTeX package
23 Package textcomp Info: Sub-encoding information:
24 (textcomp) 5 = only ISO-Adobe without \textcurrency
25 (textcomp) 4 = 5 + \texteuro
26 (textcomp) 3 = 4 + \textohm
27 (textcomp) 2 = 3 + \textestimated + \textcurrency
28 (textcomp) 1 = TS1 - \textcircled - \t
29 (textcomp) 0 = TS1 (full)
30 (textcomp) Font families with sub-encoding setting implement
31 (textcomp) only a restricted character set as indicated.
32 (textcomp) Family '?' is the default used for unknown fonts.
33 (textcomp) See the documentation for details.
34 Package textcomp Info: Setting ? sub-encoding to TS1/1 on input line 79.
35 (c:/TeXLive/2015/texmf-dist/tex/latex/base/tslenc.def
36 File: tslenc.def 2001/06/05 v3.0e (jkkar/fm) Standard LaTeX file
37 Now handling font encoding TS1 ...
38 ... processing UTF-8 mapping file for font encoding TS1
39 (c:/TeXLive/2015/texmf-dist/tex/latex/base/tslenc.dfu
40 File: tslenc.dfu 2016/02/28 v1.1s UTF-8 support for inputenc
41 defining Unicode char U+00A2 (decimal 162)
42 defining Unicode char U+00A3 (decimal 163)
43 defining Unicode char U+00A4 (decimal 164)
44 defining Unicode char U+00A5 (decimal 165)
45 defining Unicode char U+00A6 (decimal 166)
46 defining Unicode char U+00A7 (decimal 167)
47 defining Unicode char U+00A8 (decimal 168)
48 defining Unicode char U+00A9 (decimal 169)
49 defining Unicode char U+00AA (decimal 170)
50 defining Unicode char U+00AC (decimal 172)
51 defining Unicode char U+00AE (decimal 174)
52 defining Unicode char U+00AF (decimal 175)
53 defining Unicode char U+00B0 (decimal 176)
54 defining Unicode char U+00B1 (decimal 177)
55 defining Unicode char U+00B2 (decimal 178)
56 defining Unicode char U+00B3 (decimal 179)
57 defining Unicode char U+00B4 (decimal 180)
58
59
60
61
62
63
64
65
```

```
1
2
3
4     defining Unicode char U+00B5 (decimal 181)
5     defining Unicode char U+00B6 (decimal 182)
6     defining Unicode char U+00B7 (decimal 183)
7     defining Unicode char U+00B9 (decimal 185)
8     defining Unicode char U+00BA (decimal 186)
9     defining Unicode char U+00BC (decimal 188)
10    defining Unicode char U+00BD (decimal 189)
11    defining Unicode char U+00BE (decimal 190)
12    defining Unicode char U+00D7 (decimal 215)
13    defining Unicode char U+00F7 (decimal 247)
14    defining Unicode char U+0192 (decimal 402)
15    defining Unicode char U+02C7 (decimal 711)
16    defining Unicode char U+02D8 (decimal 728)
17    defining Unicode char U+02DD (decimal 733)
18    defining Unicode char U+0E3F (decimal 3647)
19    defining Unicode char U+2016 (decimal 8214)
20    defining Unicode char U+2020 (decimal 8224)
21    defining Unicode char U+2021 (decimal 8225)
22    defining Unicode char U+2022 (decimal 8226)
23    defining Unicode char U+2030 (decimal 8240)
24    defining Unicode char U+2031 (decimal 8241)
25    defining Unicode char U+203B (decimal 8251)
26    defining Unicode char U+203D (decimal 8253)
27    defining Unicode char U+2044 (decimal 8260)
28    defining Unicode char U+204E (decimal 8270)
29    defining Unicode char U+2052 (decimal 8274)
30    defining Unicode char U+20A1 (decimal 8353)
31    defining Unicode char U+20A4 (decimal 8356)
32    defining Unicode char U+20A6 (decimal 8358)
33    defining Unicode char U+20A9 (decimal 8361)
34    defining Unicode char U+20AB (decimal 8363)
35    defining Unicode char U+20AC (decimal 8364)
36    defining Unicode char U+20B1 (decimal 8369)
37    defining Unicode char U+2103 (decimal 8451)
38    defining Unicode char U+2116 (decimal 8470)
39    defining Unicode char U+2117 (decimal 8471)
40    defining Unicode char U+211E (decimal 8478)
41    defining Unicode char U+2120 (decimal 8480)
42    defining Unicode char U+2122 (decimal 8482)
43    defining Unicode char U+2126 (decimal 8486)
44    defining Unicode char U+2127 (decimal 8487)
45    defining Unicode char U+212E (decimal 8494)
46    defining Unicode char U+2190 (decimal 8592)
47    defining Unicode char U+2191 (decimal 8593)
48    defining Unicode char U+2192 (decimal 8594)
49    defining Unicode char U+2193 (decimal 8595)
50    defining Unicode char U+2329 (decimal 9001)
51    defining Unicode char U+232A (decimal 9002)
52    defining Unicode char U+2422 (decimal 9250)
53    defining Unicode char U+25E6 (decimal 9702)
54    defining Unicode char U+25EF (decimal 9711)
55    defining Unicode char U+266A (decimal 9834)
56
57
58
59 ))
60 LaTeX Info: Redefining \oldstylenums on input line 334.
61
62
63
64
65
```

1  
2  
3  
4 Package textcomp Info: Setting cmr sub-encoding to TS1/0 on input line  
5 349.  
6 Package textcomp Info: Setting cmss sub-encoding to TS1/0 on input line  
7 350.  
8 Package textcomp Info: Setting cmtt sub-encoding to TS1/0 on input line  
9 351.  
10 Package textcomp Info: Setting cmvtt sub-encoding to TS1/0 on input line  
11 352.  
12 Package textcomp Info: Setting cmbr sub-encoding to TS1/0 on input line  
13 353.  
14 Package textcomp Info: Setting cmtl sub-encoding to TS1/0 on input line  
15 354.  
16 Package textcomp Info: Setting ccr sub-encoding to TS1/0 on input line  
17 355.  
18 Package textcomp Info: Setting ptm sub-encoding to TS1/4 on input line  
19 356.  
20 Package textcomp Info: Setting pcr sub-encoding to TS1/4 on input line  
21 357.  
22 Package textcomp Info: Setting phv sub-encoding to TS1/4 on input line  
23 358.  
24 Package textcomp Info: Setting ppl sub-encoding to TS1/3 on input line  
25 359.  
26 Package textcomp Info: Setting pag sub-encoding to TS1/4 on input line  
27 360.  
28 Package textcomp Info: Setting pbk sub-encoding to TS1/4 on input line  
29 361.  
30 Package textcomp Info: Setting pnc sub-encoding to TS1/4 on input line  
31 362.  
32 Package textcomp Info: Setting pzc sub-encoding to TS1/4 on input line  
33 363.  
34 Package textcomp Info: Setting bch sub-encoding to TS1/4 on input line  
35 364.  
36 Package textcomp Info: Setting put sub-encoding to TS1/5 on input line  
37 365.  
38 Package textcomp Info: Setting uag sub-encoding to TS1/5 on input line  
39 366.  
40 Package textcomp Info: Setting ugq sub-encoding to TS1/5 on input line  
41 367.  
42 Package textcomp Info: Setting ul8 sub-encoding to TS1/4 on input line  
43 368.  
44 Package textcomp Info: Setting ul9 sub-encoding to TS1/4 on input line  
45 369.  
46 Package textcomp Info: Setting augie sub-encoding to TS1/5 on input line  
47 370.  
48 Package textcomp Info: Setting dayrom sub-encoding to TS1/3 on input line  
49 371.  
50 Package textcomp Info: Setting dayroms sub-encoding to TS1/3 on input  
51 line 372.  
52  
53  
54  
55 Package textcomp Info: Setting pxr sub-encoding to TS1/0 on input line  
56 373.  
57 Package textcomp Info: Setting pxss sub-encoding to TS1/0 on input line  
58 374.  
59  
60  
61  
62  
63  
64  
65

1  
2  
3  
4 Package textcomp Info: Setting pxtt sub-encoding to TS1/0 on input line  
5 375.  
6 Package textcomp Info: Setting txr sub-encoding to TS1/0 on input line  
7 376.  
8 Package textcomp Info: Setting txss sub-encoding to TS1/0 on input line  
9 377.  
10 Package textcomp Info: Setting txtt sub-encoding to TS1/0 on input line  
11 378.  
12 Package textcomp Info: Setting lmr sub-encoding to TS1/0 on input line  
13 379.  
14 Package textcomp Info: Setting lmdh sub-encoding to TS1/0 on input line  
15 380.  
16 Package textcomp Info: Setting lmss sub-encoding to TS1/0 on input line  
17 381.  
18 Package textcomp Info: Setting lmssq sub-encoding to TS1/0 on input line  
19 382.  
20 Package textcomp Info: Setting lmvtt sub-encoding to TS1/0 on input line  
21 383.  
22 Package textcomp Info: Setting lmtt sub-encoding to TS1/0 on input line  
23 384.  
24 Package textcomp Info: Setting qhv sub-encoding to TS1/0 on input line  
25 385.  
26 Package textcomp Info: Setting qag sub-encoding to TS1/0 on input line  
27 386.  
28 Package textcomp Info: Setting qbk sub-encoding to TS1/0 on input line  
29 387.  
30 Package textcomp Info: Setting qcr sub-encoding to TS1/0 on input line  
31 388.  
32 Package textcomp Info: Setting qcs sub-encoding to TS1/0 on input line  
33 389.  
34 Package textcomp Info: Setting qpl sub-encoding to TS1/0 on input line  
35 390.  
36 Package textcomp Info: Setting qtm sub-encoding to TS1/0 on input line  
37 391.  
38 Package textcomp Info: Setting qzc sub-encoding to TS1/0 on input line  
39 392.  
40 Package textcomp Info: Setting qhvc sub-encoding to TS1/0 on input line  
41 393.  
42 Package textcomp Info: Setting futs sub-encoding to TS1/4 on input line  
43 394.  
44 Package textcomp Info: Setting futx sub-encoding to TS1/4 on input line  
45 395.  
46 Package textcomp Info: Setting futj sub-encoding to TS1/4 on input line  
47 396.  
48 Package textcomp Info: Setting hlh sub-encoding to TS1/3 on input line  
49 397.  
50 Package textcomp Info: Setting hls sub-encoding to TS1/3 on input line  
51 398.  
52 Package textcomp Info: Setting hlst sub-encoding to TS1/3 on input line  
53 399.  
54 Package textcomp Info: Setting hlct sub-encoding to TS1/5 on input line  
55 400.  
56 Package textcomp Info: Setting hlx sub-encoding to TS1/5 on input line  
57 401.  
58  
59  
60  
61  
62  
63  
64  
65



```

1
2
3
4 Package textcomp Info: Setting hlce sub-encoding to TS1/5 on input line
5 402.
6 Package textcomp Info: Setting hlcn sub-encoding to TS1/5 on input line
7 403.
8 Package textcomp Info: Setting hlcv sub-encoding to TS1/5 on input line
9 404.
10 Package textcomp Info: Setting hlcf sub-encoding to TS1/5 on input line
11 405.
12 Package textcomp Info: Setting pplx sub-encoding to TS1/3 on input line
13 406.
14 Package textcomp Info: Setting pplj sub-encoding to TS1/3 on input line
15 407.
16 Package textcomp Info: Setting ptmx sub-encoding to TS1/4 on input line
17 408.
18 Package textcomp Info: Setting ptmj sub-encoding to TS1/4 on input line
19 409.
20
21 ) (c:/TeXLive/2015/texmf-dist/tex/latex/xkeyval/xkeyval.sty
22 Package: xkeyval 2014/12/03 v2.7a package option processing (HA)
23 (c:/TeXLive/2015/texmf-dist/tex/generic/xkeyval/xkeyval.tex
24 (c:/TeXLive/2015/te
25 xmf-dist/tex/generic/xkeyval/xkvutils.tex
26 \XKV@toks=\toks18
27 \XKV@tempa@toks=\toks19
28 )
29 \XKV@depth=\count89
30 File: xkeyval.tex 2014/12/03 v2.7a key=value parser (HA)
31 )) (c:/TeXLive/2015/texmf-dist/tex/latex/base/fontenc.sty
32 Package: fontenc 2005/09/27 v1.99g Standard LaTeX package
33 ) (c:/TeXLive/2015/texmf-dist/tex/latex/fontaxes/fontaxes.sty
34 Package: fontaxes 2014/03/23 v1.0d Font selection axes
35 LaTeX Info: Redefining \upshape on input line 29.
36 LaTeX Info: Redefining \itshape on input line 31.
37 LaTeX Info: Redefining \slshape on input line 33.
38 LaTeX Info: Redefining \scshape on input line 37.
39 ) (c:/TeXLive/2015/texmf-dist/tex/latex/mweights/mweights.sty
40 Package: mweights 2013/07/21 (Bob Tennent) Support package for multiple-
41 weight
42 font packages.
43 LaTeX Info: Redefining \bfseries on input line 22.
44 LaTeX Info: Redefining \mdseries on input line 29.
45 LaTeX Info: Redefining \rmfamily on input line 36.
46 LaTeX Info: Redefining \sffamily on input line 53.
47 LaTeX Info: Redefining \ttfamily on input line 70.
48 )) (c:/TeXLive/2015/texmf-dist/tex/latex/mathastext/mathastext.sty
49 Package: mathastext 2016/04/02 v1.3m Use the text font in math mode (jfb)
50 \mst@exists@muskip=\muskip10
51 \mst@forall@muskip=\muskip11
52 \mst@prime@muskip=\muskip12
53 \mst@do@nonletters=\toks20
54 \mst@do@easynonletters=\toks21
55 \mst@do@az=\toks22
56 \mst@do@AZ=\toks23
57 \symmoperatorfont=\mathgroup8
58 \symmletterfont=\mathgroup9
59
60
61
62
63
64
65

```

```

1
2
3
4 LaTeX Font Info: Overwriting math alphabet '\mathnormalbold' in
5 version `normal'
6
7 (Font) T1/Merriweather-OsF/bx/it --> T1/Merriweather-
8 OsF/bx/it
9 on input line 1007.
10 LaTeX Font Info: Overwriting math alphabet '\mathnormalbold' in
11 version `bold'
12
13 (Font) T1/Merriweather-OsF/bx/it --> T1/Merriweather-
14 OsF/bx/it
15 on input line 1007.
16 LaTeX Font Info: Overwriting symbol font `mtletterfont' in version
17 `normal'
18
19 (Font) T1/Merriweather-OsF/m/it --> T1/Merriweather-
20 OsF/m/it
21 on input line 1007.
22 LaTeX Font Info: Overwriting symbol font `mtletterfont' in version
23 `bold'
24
25 (Font) T1/Merriweather-OsF/m/it --> T1/Merriweather-
26 OsF/bx/it
27 on input line 1007.
28 LaTeX Font Info: Overwriting symbol font `mtoperatorfont' in version
29 `normal'
30
31 (Font) T1/Merriweather-OsF/m/n --> T1/Merriweather-
32 OsF/m/n
33 on input line 1007.
34 LaTeX Font Info: Overwriting symbol font `mtoperatorfont' in version
35 `bold'
36
37 (Font) T1/Merriweather-OsF/m/n --> T1/Merriweather-
38 OsF/bx/n
39 on input line 1007.
40 LaTeX Font Info: Overwriting math alphabet '\Mathbf' in version
41 `normal'
42
43 (Font) T1/Merriweather-OsF/bx/n --> T1/Merriweather-
44 OsF/bx/n
45 on input line 1007.
46 LaTeX Font Info: Overwriting math alphabet '\Mathbf' in version `bold'
47
48 (Font) T1/Merriweather-OsF/bx/n --> T1/Merriweather-
49 OsF/bx/n
50 on input line 1007.
51 LaTeX Font Info: Overwriting math alphabet '\Mathit' in version
52 `normal'
53
54 (Font) T1/Merriweather-OsF/m/it --> T1/Merriweather-
55 OsF/m/it
56 on input line 1007.
57 LaTeX Font Info: Overwriting math alphabet '\Mathit' in version `bold'
58
59 (Font) T1/Merriweather-OsF/m/it --> T1/Merriweather-
60 OsF/bx/it
61 on input line 1007.
62 LaTeX Font Info: Overwriting math alphabet '\Mathsf' in version
63 `normal'
64
65

```

```

1
2
3
4 (Font) T1/MerriweatherSans-TLF/m/n -->
5 T1/MerriweatherSans-TLF
6 /m/n on input line 1007.
7 LaTeX Font Info: Overwriting math alphabet '\Mathsf' in version 'bold'
8 (Font) T1/MerriweatherSans-TLF/m/n -->
9 T1/MerriweatherSans-TLF
10 /bx/n on input line 1007.
11 LaTeX Font Info: Overwriting math alphabet '\Mathtt' in version
12 'normal'
13 (Font) T1/lmmt/m/n --> T1/lmmt/m/n on input line 1007.
14 LaTeX Font Info: Overwriting math alphabet '\Mathtt' in version 'bold'
15 (Font) T1/lmmt/m/n --> T1/lmmt/bx/n on input line 1007.
16 ** Latin letters in the normal (resp. bold) math versions are now
17 ** set up to use the fonts T1/Merriweather-OsF/m(bx)/it
18 ** Other characters (digits, ...) and \log-like names will be
19 ** typeset with the n shape.
20 ** ! and ?
21 ** punctuation: , . : ; and \colon
22 LaTeX Info: Redefining \relbar on input line 1153.
23 ** minus as endash
24 ** \hbar
25 ** + and =
26 LaTeX Info: Redefining \Relbar on input line 1255.
27 ** adding = ; and + to \nfss@catcodes
28 ** parentheses ( ) [ ] and slash /
29 ** alldelims: < > \backslash \setminus | \vert \mid \{ and \}
30 LaTeX Font Info: Redefining math delimiter \backslash on input line
31 1301.
32 LaTeX Font Info: Redefining math symbol \setminus on input line 1313.
33 LaTeX Info: Redefining \models on input line 1322.
34 ** \# \mathdollar \% \&
35 ** \i and \j
36 LaTeX Info: Redefining \i on input line 1893.
37 LaTeX Info: Redefining \j on input line 1894.
38 ** \HUGE has been (re)-defined.
39 ** mathastext has declared larger sizes for subscripts.
40 ** To keep LaTeX defaults, use option 'defaultmathsizes'.
41 ) (c:/TeXLive/2015/texmf-dist/tex/latex/resize/resize.sty
42 Package: resize 2013/03/29 ver 4.1
43 ) (c:/TeXLive/2015/texmf-dist/tex/latex/ms/ragged2e.sty
44 Package: ragged2e 2009/05/21 v2.1 ragged2e Package (MS)
45 (c:/TeXLive/2015/texmf-dist/tex/latex/ms/everyselectfont.sty
46 Package: everyselectfont 2011/10/28 v1.2 EverySelectfont Package (MS)
47 )
48 \CenteringLeftskip=\skip44
49 \RaggedLeftLeftskip=\skip45
50 \RaggedRightLeftskip=\skip46
51 \CenteringRightskip=\skip47
52 \RaggedLeftRightskip=\skip48
53 \RaggedRightRightskip=\skip49
54 \CenteringParfillskip=\skip50
55 \RaggedLeftParfillskip=\skip51
56 \RaggedRightParfillskip=\skip52
57 \JustifyingParfillskip=\skip53
58
59
60
61
62
63
64
65

```

```

1
2
3
4 \CenteringParindent=\skip54
5 \RaggedLeftParindent=\skip55
6 \RaggedRightParindent=\skip56
7 \JustifyingParindent=\skip57
8 ) (c:/TeXLive/2015/texmf-dist/tex/latex/xcolor/xcolor.sty
9 Package: xcolor 2007/01/21 v2.11 LaTeX color extensions (UK)
10 (c:/TeXLive/2015/texmf-dist/tex/latex/latexconfig/color.cfg
11 File: color.cfg 2007/01/18 v1.5 color configuration of teTeX/TeXLive
12 )
13 Package xcolor Info: Driver file: pdftex.def on input line 225.
14 (c:/TeXLive/2015/texmf-dist/tex/latex/pdftex-def/pdftex.def
15 File: pdftex.def 2011/05/27 v0.06d Graphics/color for pdfTeX
16 (c:/TeXLive/2015/texmf-dist/tex/generic/oberdiek/infwarerr.sty
17 Package: infwarerr 2010/04/08 v1.3 Providing info/warning/error messages
18 (HO)
19 ) (c:/TeXLive/2015/texmf-dist/tex/generic/oberdiek/ltxcmds.sty
20 Package: ltxcmds 2011/11/09 v1.22 LaTeX kernel commands for general use
21 (HO)
22 )
23 )
24 \Gread@gobject=\count90
25 )
26 Package xcolor Info: Model `cmy' substituted by `cmy0' on input line
27 1337.
28 Package xcolor Info: Model `hsb' substituted by `rgb' on input line 1341.
29 Package xcolor Info: Model `RGB' extended on input line 1353.
30 Package xcolor Info: Model `HTML' substituted by `rgb' on input line
31 1355.
32 Package xcolor Info: Model `Hsb' substituted by `hsb' on input line 1356.
33 Package xcolor Info: Model `tHsb' substituted by `hsb' on input line
34 1357.
35 Package xcolor Info: Model `HSB' substituted by `hsb' on input line 1358.
36 Package xcolor Info: Model `Gray' substituted by `gray' on input line
37 1359.
38 Package xcolor Info: Model `wave' substituted by `hsb' on input line
39 1360.
40 ) (c:/TeXLive/2015/texmf-dist/tex/latex/colortbl/colortbl.sty
41 Package: colortbl 2012/02/13 v1.0a Color table columns (DPC)
42 (c:/TeXLive/2015/texmf-dist/tex/latex/tools/array.sty
43 Package: array 2014/10/28 v2.4c Tabular extension package (FMI)
44 \col@sep=\dimen104
45 \extrarowheight=\dimen105
46 \NC@list=\toks24
47 \extratabsurround=\skip58
48 \backup@length=\skip59
49 )
50 )
51 \everycr=\toks25
52 \minrowclearance=\skip60
53 ) (c:/TeXLive/2015/texmf-dist/tex/latex/graphics/graphicx.sty
54 Package: graphicx 2014/10/28 v1.0g Enhanced LaTeX Graphics (DPC,SPQR)
55 (c:/TeXLive/2015/texmf-dist/tex/latex/graphics/graphics.sty
56 Package: graphics 2016/01/03 v1.0q Standard LaTeX Graphics (DPC,SPQR)
57 (c:/TeXLive/2015/texmf-dist/tex/latex/graphics/trig.sty
58 Package: trig 2016/01/03 v1.10 sin cos tan (DPC)
59 ) (c:/TeXLive/2015/texmf-dist/tex/latex/latexconfig/graphics.cfg
60
61
62
63
64
65

```

```
1
2
3
4 File: graphics.cfg 2010/04/23 v1.9 graphics configuration of TeX Live
5 )
6 Package graphics Info: Driver file: pdftex.def on input line 95.
7 )
8 \Gin@req@height=\dimen106
9 \Gin@req@width=\dimen107
10 ) (c:/TeXLive/2015/texmf-dist/tex/latex/etoolbox/etoolbox.sty
11 Package: etoolbox 2015/08/02 v2.2a e-TeX tools for LaTeX (JAW)
12 \etb@tempcnta=\count91
13 ) (c:/TeXLive/2015/texmf-dist/tex/latex/xpatch/xpatch.sty
14 (c:/TeXLive/2015/texm
15 f-dist/tex/latex/l3kernel/expl3.sty
16 Package: expl3 2016/03/28 v6468 L3 programming layer (loader)
17 (c:/TeXLive/2015/texmf-dist/tex/latex/l3kernel/expl3-code.tex
18 Package: expl3 2016/03/28 v6468 L3 programming layer (code)
19 L3 Module: l3bootstrap 2016/02/12 v6412 L3 Bootstrap code
20 L3 Module: l3names 2016/03/11 v6433 L3 Namespace for primitives
21 L3 Module: l3basics 2015/11/22 v6315 L3 Basic definitions
22 L3 Module: l3expan 2015/09/10 v5983 L3 Argument expansion
23 L3 Module: l3t1 2016/03/26 v6465 L3 Token lists
24 L3 Module: l3str 2016/03/24 v6441 L3 Strings
25 L3 Module: l3seq 2015/08/05 v5777 L3 Sequences and stacks
26 L3 Module: l3int 2016/03/24 v6441 L3 Integers
27 \c_max_int=\count92
28 \l_tmpa_int=\count93
29 \l_tmpb_int=\count94
30 \g_tmpa_int=\count95
31 \g_tmpb_int=\count96
32 L3 Module: l3quark 2015/08/17 v5855 L3 Quarks
33 L3 Module: l3prg 2015/11/01 v6216 L3 Control structures
34 \g__prg_map_int=\count97
35 L3 Module: l3clist 2015/09/02 v5901 L3 Comma separated lists
36 L3 Module: l3token 2016/03/26 v6465 L3 Experimental token manipulation
37 L3 Module: l3prop 2016/01/05 v6366 L3 Property lists
38 L3 Module: l3msg 2016/03/26 v6464 L3 Messages
39 L3 Module: l3file 2016/03/25 v6458 L3 File and I/O operations
40 \l_iow_line_count_int=\count98
41 \l__iow_target_count_int=\count99
42 \l__iow_current_line_int=\count100
43 \l__iow_current_word_int=\count101
44 \l__iow_current_indentation_int=\count102
45 L3 Module: l3skip 2016/01/05 v6366 L3 Dimensions and skips
46 \c_zero_dim=\dimen108
47 \c_max_dim=\dimen109
48 \l_tmpa_dim=\dimen110
49 \l_tmpb_dim=\dimen111
50 \g_tmpa_dim=\dimen112
51 \g_tmpb_dim=\dimen113
52 \c_zero_skip=\skip61
53 \c_max_skip=\skip62
54 \l_tmpa_skip=\skip63
55 \l_tmpb_skip=\skip64
56 \g_tmpa_skip=\skip65
57 \g_tmpb_skip=\skip66
58
59
60
61
62
63
64
65
```

1  
2  
3  
4     \c\_zero\_muskip=\muskip13  
5     \c\_max\_muskip=\muskip14  
6     \l\_tmpa\_muskip=\muskip15  
7     \l\_tmpb\_muskip=\muskip16  
8     \g\_tmpa\_muskip=\muskip17  
9     \g\_tmpb\_muskip=\muskip18  
10  L3 Module: l3keys 2015/11/17 v6284 L3 Key-value interfaces  
11  \g\_keyval\_level\_int=\count103  
12  \l\_keys\_choice\_int=\count104  
13  L3 Module: l3fp 2016/03/26 v6465 L3 Floating points  
14  \c\_fp\_leading\_shift\_int=\count105  
15  \c\_fp\_middle\_shift\_int=\count106  
16  \c\_fp\_trailing\_shift\_int=\count107  
17  \c\_fp\_big\_leading\_shift\_int=\count108  
18  \c\_fp\_big\_middle\_shift\_int=\count109  
19  \c\_fp\_big\_trailing\_shift\_int=\count110  
20  \c\_fp\_Bigg\_leading\_shift\_int=\count111  
21  \c\_fp\_Bigg\_middle\_shift\_int=\count112  
22  \c\_fp\_Bigg\_trailing\_shift\_int=\count113  
23  L3 Module: l3box 2015/08/09 v5822 L3 Experimental boxes  
24  \c\_empty\_box=\box26  
25  \l\_tmpa\_box=\box27  
26  \l\_tmpb\_box=\box28  
27  \g\_tmpa\_box=\box29  
28  \g\_tmpb\_box=\box30  
29  L3 Module: l3coffins 2016/03/24 v6440 L3 Coffin code layer  
30  \l\_coffin\_internal\_box=\box31  
31  \l\_coffin\_internal\_dim=\dimen114  
32  \l\_coffin\_offset\_x\_dim=\dimen115  
33  \l\_coffin\_offset\_y\_dim=\dimen116  
34  \l\_coffin\_x\_dim=\dimen117  
35  \l\_coffin\_y\_dim=\dimen118  
36  \l\_coffin\_x\_prime\_dim=\dimen119  
37  \l\_coffin\_y\_prime\_dim=\dimen120  
38  \c\_empty\_coffin=\box32  
39  \l\_coffin\_aligned\_coffin=\box33  
40  \l\_coffin\_aligned\_internal\_coffin=\box34  
41  \l\_tmpa\_coffin=\box35  
42  \l\_tmpb\_coffin=\box36  
43  \l\_coffin\_display\_coffin=\box37  
44  \l\_coffin\_display\_coord\_coffin=\box38  
45  \l\_coffin\_display\_pole\_coffin=\box39  
46  \l\_coffin\_display\_offset\_dim=\dimen121  
47  \l\_coffin\_display\_x\_dim=\dimen122  
48  \l\_coffin\_display\_y\_dim=\dimen123  
49  L3 Module: l3color 2014/08/23 v5354 L3 Experimental color support  
50  L3 Module: l3sys 2015/09/25 v6087 L3 Experimental system/runtime  
51  functions  
52  L3 Module: l3candidates 2016/03/25 v6456 L3 Experimental additions to  
53  l3kernel  
54  \l\_box\_top\_dim=\dimen124  
55  \l\_box\_bottom\_dim=\dimen125  
56  \l\_box\_left\_dim=\dimen126  
57  \l\_box\_right\_dim=\dimen127  
58  
59  
60  
61  
62  
63  
64  
65

```

1
2
3
4 \l__box_top_new_dim=\dimen128
5 \l__box_bottom_new_dim=\dimen129
6 \l__box_left_new_dim=\dimen130
7 \l__box_right_new_dim=\dimen131
8 \l__box_internal_box=\box40
9
10 \l__coffin_bounding_shift_dim=\dimen132
11 \l__coffin_left_corner_dim=\dimen133
12 \l__coffin_right_corner_dim=\dimen134
13 \l__coffin_bottom_corner_dim=\dimen135
14 \l__coffin_top_corner_dim=\dimen136
15 \l__coffin_scaled_total_height_dim=\dimen137
16 \l__coffin_scaled_width_dim=\dimen138
17 L3 Module: l3luatex 2016/03/26 v6465 L3 Experimental LuaTeX-specific
18 functions
19 ) (c:/TeXLive/2015/texmf-dist/tex/latex/l3kernel/l3pdfmode.def
20 File: l3pdfmode.def 2016/03/26 v6465 L3 Experimental driver: PDF mode
21 \l__driver_color_stack_int=\count114
22 ))
23 Package: xpatch 2012/10/02 v0.3 Extending etoolbox patching commands
24 (c:/TeXLive/2015/texmf-dist/tex/latex/l3packages/xparse/xparse.sty
25 Package: xparse 2016/03/28 v6468 L3 Experimental document command parser
26 \l__xparse_current_arg_int=\count115
27 \l__xparse_m_args_int=\count116
28 \l__xparse_mandatory_args_int=\count117
29 \l__xparse_processor_int=\count118
30 \l__xparse_v_nesting_int=\count119
31 )
32
33 .....
34 . LaTeX info: "xparse/define-command"
35 .
36 . Defining command \xpatchcmd with sig. ' ' on line 125.
37 .....
38 .....
39 . LaTeX info: "xparse/define-command"
40 .
41 . Defining command \xpretocmd with sig. ' ' on line 126.
42 .....
43 .....
44 . LaTeX info: "xparse/define-command"
45 .
46 . Defining command \xapptocmd with sig. ' ' on line 127.
47 .....
48 .....
49 . LaTeX info: "xparse/define-command"
50 .
51 . Defining command \xshowcmd with sig. ' ' on line 128.
52 .....
53 .....
54 . LaTeX info: "xparse/define-command"
55 .
56 . Defining command \xpatchbibmacro with sig. 'm' on line 131.
57 .....
58 .....
59 . LaTeX info: "xparse/define-command"
60
61
62
63
64
65

```

```
1
2
3
4
5 . Defining command \xpretobibmacro with sig. 'm' on line 133.
6 .....
7 .....
8 . LaTeX info: "xparse/define-command"
9
10 . Defining command \xapptobibmacro with sig. 'm' on line 135.
11 .....
12 .....
13 . LaTeX info: "xparse/define-command"
14
15 . Defining command \xshowbibmacro with sig. 'm' on line 137.
16 .....
17 .....
18 . LaTeX info: "xparse/define-command"
19
20 . Defining command \xpatchfieldformat with sig. 'O{*}m' on line 139.
21 .....
22 .....
23 . LaTeX info: "xparse/define-command"
24
25 . Defining command \xpretofieldformat with sig. 'O{*}m' on line 141.
26 .....
27 .....
28 . LaTeX info: "xparse/define-command"
29
30 . Defining command \xapptofieldformat with sig. 'O{*}m' on line 143.
31 .....
32 .....
33 . LaTeX info: "xparse/define-command"
34
35 . Defining command \xshowfieldformat with sig. 'O{*}m' on line 145.
36 .....
37 .....
38 . LaTeX info: "xparse/define-command"
39
40 . Defining command \xpatchnameformat with sig. 'O{*}m' on line 147.
41 .....
42 .....
43 . LaTeX info: "xparse/define-command"
44
45 . Defining command \xpretonameformat with sig. 'O{*}m' on line 149.
46 .....
47 .....
48 . LaTeX info: "xparse/define-command"
49
50 . Defining command \xapptonameformat with sig. 'O{*}m' on line 151.
51 .....
52 .....
53 . LaTeX info: "xparse/define-command"
54
55 . Defining command \xshownameformat with sig. 'O{*}m' on line 153.
56 .....
57 .....
58 .....
59 .....
60 .....
61 .....
62 .....
63 .....
64 .....
65 .....
```



```
1
2
3
4 . LaTeX info: "xparse/define-command"
5 .
6 . Defining command \xpatchlistformat with sig. 'O{*}m' on line 155.
7 .....
8 .....
9 . LaTeX info: "xparse/define-command"
10 .
11 . Defining command \xpretolistformat with sig. 'O{*}m' on line 157.
12 .....
13 .....
14 . LaTeX info: "xparse/define-command"
15 .
16 . Defining command \xapptolistformat with sig. 'O{*}m' on line 159.
17 .....
18 .....
19 . LaTeX info: "xparse/define-command"
20 .
21 . Defining command \xshowlistformat with sig. 'O{*}m' on line 161.
22 .....
23 .....
24 . LaTeX info: "xparse/define-command"
25 .
26 . Defining command \xpatchindexfieldformat with sig. 'O{*}m' on line 163.
27 .....
28 .....
29 . LaTeX info: "xparse/define-command"
30 .
31 . Defining command \xpretoindexfieldformat with sig. 'O{*}m' on line 165.
32 .....
33 .....
34 . LaTeX info: "xparse/define-command"
35 .
36 . Defining command \xapptoindexfieldformat with sig. 'O{*}m' on line 167.
37 .....
38 .....
39 . LaTeX info: "xparse/define-command"
40 .
41 . Defining command \xshowindexfieldformat with sig. 'O{*}m' on line 169.
42 .....
43 .....
44 . LaTeX info: "xparse/define-command"
45 .
46 . Defining command \xpatchindexnameformat with sig. 'O{*}m' on line 171.
47 .....
48 .....
49 . LaTeX info: "xparse/define-command"
50 .
51 . Defining command \xpretoindexnameformat with sig. 'O{*}m' on line 173.
52 .....
53 .....
54 . LaTeX info: "xparse/define-command"
55 .
56 . Defining command \xapptoindexnameformat with sig. 'O{*}m' on line 175.
57 .....
58 .....
59 .....
60 .....
61 .....
62 .....
63 .....
64 .....
65 .....
```

```

1
2
3
4
5 .....
6 . LaTeX info: "xparse/define-command"
7 .
8 . Defining command \xshowindexnameformat with sig. 'O{*}m' on line 177.
9 .....
10 .....
11 . LaTeX info: "xparse/define-command"
12 .
13 . Defining command \xpatchindexlistformat with sig. 'O{*}m' on line 179.
14 .....
15 .....
16 . LaTeX info: "xparse/define-command"
17 .
18 . Defining command \xpretoindexlistformat with sig. 'O{*}m' on line 181.
19 .....
20 .....
21 . LaTeX info: "xparse/define-command"
22 .
23 . Defining command \xappindextolistformat with sig. 'O{*}m' on line 183.
24 .....
25 .....
26 . LaTeX info: "xparse/define-command"
27 .
28 . Defining command \xshowindexlistformat with sig. 'O{*}m' on line 185.
29 .....
30 .....
31 . LaTeX info: "xparse/define-command"
32 .
33 . Defining command \xpatchbibdriver with sig. 'm' on line 187.
34 .....
35 .....
36 .....
37 . LaTeX info: "xparse/define-command"
38 .
39 . Defining command \xpretobibdriver with sig. 'm' on line 189.
40 .....
41 .....
42 . LaTeX info: "xparse/define-command"
43 .
44 . Defining command \xapptobibdriver with sig. 'm' on line 191.
45 .....
46 .....
47 . LaTeX info: "xparse/define-command"
48 .
49 . Defining command \xshowbibdriver with sig. 'm' on line 193.
50 .....
51 ) (c:/TeXLive/2015/texmf-dist/tex/latex/environ/environ.sty
52 Package: environ 2014/05/04 v0.3 A new way to define environments
53 (c:/TeXLive/2015/texmf-dist/tex/latex/trimspaces/trimspaces.sty
54 Package: trimspaces 2009/09/17 v1.1 Trim spaces around a token list
55 )
56 \@envbody=\toks26
57 ) (c:/TeXLive/2015/texmf-dist/tex/latex/lastpage/lastpage.sty
58 Package: lastpage 2015/03/29 v1.2m Refers to last page's name (HMM; JPG)
59 ) (c:/TeXLive/2015/texmf-dist/tex/latex/rotating/rotating.sty
60
61
62
63
64
65

```

1  
2  
3  
4 Package: rotating 2009/03/28 v2.16a rotated objects in LaTeX  
5 (c:/TeXLive/2015/texmf-dist/tex/latex/base/ifthen.sty  
6 Package: ifthen 2014/09/29 v1.1c Standard LaTeX ifthen package (DPC)  
7 )  
8 \c@r@tfl@t=\count120  
9 \rotFPtop=\skip67  
10 \rotFPbot=\skip68  
11 \rot@float@box=\box41  
12 \rot@mess@toks=\toks27  
13 ) (c:/TeXLive/2015/texmf-dist/tex/latex/graphics/lscap.e.sty  
14 Package: lscap.e 2000/10/22 v3.01 Landscape Pages (DPC)  
15 ) (c:/TeXLive/2015/texmf-dist/tex/latex/tools/afterpage.sty  
16 Package: afterpage 2014/10/28 v1.08 After-Page Package (DPC)  
17 \AP@output=\toks28  
18 \AP@partial=\box42  
19 \AP@footins=\box43  
20 ) (c:/TeXLive/2015/texmf-dist/tex/latex/textpos/textpos.sty  
21 Package: textpos 2014/01/03 v1.7j  
22 Package: textpos 2014/01/03 1.7j, absolute positioning of text on the  
23 page  
24 (c:/TeXLive/2015/texmf-dist/tex/latex/ms/everyshi.sty  
25 Package: everyshi 2001/05/15 v3.00 EveryShipout Package (MS)  
26 )  
27 \TP@textbox=\box44  
28 \TP@holdbox=\box45  
29 \TPHorizModule=\dimen139  
30 \TPVertModule=\dimen140  
31 \TP@margin=\dimen141  
32 \TP@absmargin=\dimen142  
33 Grid set 16 x 16 = 37.34424pt x 52.81541pt  
34 \TPboxrulesize=\dimen143  
35 \TP@ox=\dimen144  
36 \TP@oy=\dimen145  
37 \TP@tbargs=\toks29  
38 \TP@prevdepth=\dimen146  
39 TextBlockOrigin set to 0pt x 0pt  
40 ) (c:/TeXLive/2015/texmf-dist/tex/latex/url/url.sty  
41 \Urlmuskip=\muskip19  
42 Package: url 2013/09/16 ver 3.4 Verb mode for urls, etc.  
43 ) (c:/TeXLive/2015/texmf-dist/tex/latex/caption/newfloat.sty  
44 Package: newfloat 2015/09/17 v1.1-109 Defining new floating environments  
45 (AR)  
46 ) (c:/TeXLive/2015/texmf-dist/tex/latex/mdframed/mdframed.sty  
47 Package: mdframed 2013/07/01 1.9b: mdframed  
48 (c:/TeXLive/2015/texmf-dist/tex/latex/oberdiek/kvoptions.sty  
49 Package: kvoptions 2011/06/30 v3.11 Key value format for package options  
50 (HO)  
51 (c:/TeXLive/2015/texmf-dist/tex/generic/oberdiek/kvsetkeys.sty  
52 Package: kvsetkeys 2012/04/25 v1.16 Key value parser (HO)  
53 (c:/TeXLive/2015/texmf-dist/tex/generic/oberdiek/etexcmds.sty  
54 Package: etexcmds 2011/02/16 v1.5 Avoid name clashes with e-TeX commands  
55 (HO)  
56 Package etexcmds Info: Could not find \expanded.  
57  
58  
59  
60  
61  
62  
63  
64  
65

```

1
2
3
4 (etexcmds)          That can mean that you are not using pdfTeX 1.50
5 or
6 (etexcmds)          that some package has redefined \expanded.
7 (etexcmds)          In the latter case, load this package earlier.
8 ))) (c:/TeXLive/2015/texmf-dist/tex/latex/oberdiek/zref-abspage.sty
9 Package: zref-abspage 2012/04/04 v2.24 Module abspage for zref (HO)
10 (c:/TeXLive/2015/texmf-dist/tex/latex/oberdiek/zref-base.sty
11 Package: zref-base 2012/04/04 v2.24 Module base for zref (HO)
12 (c:/TeXLive/2015/texmf-dist/tex/generic/oberdiek/kvdefinekeys.sty
13 Package: kvdefinekeys 2011/04/07 v1.3 Define keys (HO)
14 ) (c:/TeXLive/2015/texmf-dist/tex/generic/oberdiek/pdfdoccmds.sty
15 Package: pdfdoccmds 2011/11/29 v0.20 Utility functions of pdfTeX for
16 LuaTeX (HO
17 )
18 Package pdfdoccmds Info: LuaTeX not detected.
19 Package pdfdoccmds Info: \pdf@primitive is available.
20 Package pdfdoccmds Info: \pdf@ifprimitive is available.
21 Package pdfdoccmds Info: \pdfdraftmode found.
22 ) (c:/TeXLive/2015/texmf-dist/tex/latex/oberdiek/auxhook.sty
23 Package: auxhook 2011/03/04 v1.3 Hooks for auxiliary files (HO)
24 )
25 Package zref Info: New property list: main on input line 759.
26 Package zref Info: New property: default on input line 760.
27 Package zref Info: New property: page on input line 761.
28 ) (c:/TeXLive/2015/texmf-dist/tex/generic/oberdiek/atbegshi.sty
29 Package: atbegshi 2011/10/05 v1.16 At begin shipout hook (HO)
30 )
31 \c@abspage=\count121
32 Package zref Info: New property: abspage on input line 62.
33 ) (c:/TeXLive/2015/texmf-dist/tex/latex/needspace/needspace.sty
34 Package: needspace 2010/09/12 v1.3d reserve vertical space
35 )
36 \mdf@templength=\skip69
37 \c@mdf@globalstyle@cnt=\count122
38 \mdf@skipabove@length=\skip70
39 \mdf@skipbelow@length=\skip71
40 \mdf@leftmargin@length=\skip72
41 \mdf@rightmargin@length=\skip73
42 \mdf@innerleftmargin@length=\skip74
43 \mdf@innerrightmargin@length=\skip75
44 \mdf@innertopmargin@length=\skip76
45 \mdf@innerbottommargin@length=\skip77
46 \mdf@splittopskip@length=\skip78
47 \mdf@splitbottomskip@length=\skip79
48 \mdf@outermargin@length=\skip80
49 \mdf@innermargin@length=\skip81
50 \mdf@linewidth@length=\skip82
51 \mdf@innerlinewidth@length=\skip83
52 \mdf@middlelinewidth@length=\skip84
53 \mdf@outerlinewidth@length=\skip85
54 \mdf@roundcorner@length=\skip86
55 \mdf@footnotedistance@length=\skip87
56 \mdf@userdefinedwidth@length=\skip88
57 \mdf@needspace@length=\skip89
58
59
60
61
62
63
64
65

```

```
1
2
3
4 \mdf@frametitleaboveskip@length=\skip90
5 \mdf@frametitlebelowskip@length=\skip91
6 \mdf@frametitlerulewidth@length=\skip92
7 \mdf@frametitleleftmargin@length=\skip93
8 \mdf@frametitlerightmargin@length=\skip94
9 \mdf@shadowsize@length=\skip95
10 \mdf@extratopheight@length=\skip96
11 \mdf@subtitleabovelinewidth@length=\skip97
12 \mdf@subtitlebelowlinewidth@length=\skip98
13 \mdf@subtitleaboveskip@length=\skip99
14 \mdf@subtitlebelowskip@length=\skip100
15 \mdf@subtitleinneraboveskip@length=\skip101
16 \mdf@subtitleinnerbelowskip@length=\skip102
17 \mdf@subsubtitleabovelinewidth@length=\skip103
18 \mdf@subsubtitlebelowlinewidth@length=\skip104
19 \mdf@subsubtitleaboveskip@length=\skip105
20 \mdf@subsubtitlebelowskip@length=\skip106
21 \mdf@subsubtitleinneraboveskip@length=\skip107
22 \mdf@subsubtitleinnerbelowskip@length=\skip108
23 (c:/TeXLive/2015/texmf-dist/tex/latex/mdframed/md-frame-0.mdf
24 File: md-frame-0.mdf 2013/07/01\ 1.9b: md-frame-0
25 )
26 \mdf@frametitlebox=\box46
27 \mdf@footnotebox=\box47
28 \mdf@splitbox@one=\box48
29 \mdf@splitbox@two=\box49
30 \mdf@splitbox@save=\box50
31 \mdfsplitboxwidth=\skip109
32 \mdfsplitboxtotalwidth=\skip110
33 \mdfsplitboxheight=\skip111
34 \mdfsplitboxdepth=\skip112
35 \mdfsplitboxtotalheight=\skip113
36 \mdfframetitleboxwidth=\skip114
37 \mdfframetitleboxtotalwidth=\skip115
38 \mdfframetitleboxheight=\skip116
39 \mdfframetitleboxdepth=\skip117
40 \mdfframetitleboxtotalheight=\skip118
41 \mdffootnoteboxwidth=\skip119
42 \mdffootnoteboxtotalwidth=\skip120
43 \mdffootnoteboxheight=\skip121
44 \mdffootnoteboxdepth=\skip122
45 \mdffootnoteboxtotalheight=\skip123
46 \mdftotalllinewidth=\skip124
47 \mdfboundingboxwidth=\skip125
48 \mdfboundingboxtotalwidth=\skip126
49 \mdfboundingboxheight=\skip127
50 \mdfboundingboxdepth=\skip128
51 \mdfboundingboxtotalheight=\skip129
52 \mdf@freevspace@length=\skip130
53 \mdf@horizontalwidthofbox@length=\skip131
54 \mdf@verticalmarginwhole@length=\skip132
55 \mdf@horizontalsofbox=\skip133
56 \mdf@subsubtitleheight=\skip134
57 \mdf@subsubsubtitleheight=\skip135
58
59
60
61
62
63
64
65
```

```

1
2
3
4 \c@mdfcountframes=\count123
5
6 ***** mdframed patching \endmdf@trivlist
7
8 ***** -- success*****
9
10 .....
11 . LaTeX info: "xparse/define-command"
12 .
13 . Defining command \newmdtheoremenv with sig. 'O{} m o m o ' on line 601.
14 .....
15 .....
16 .....
17 . LaTeX info: "xparse/define-command"
18 .
19 . Defining command \mdtheorem with sig. ' O{} m o m o ' on line 701.
20 .....
21 \mdf@envdepth=\count124
22 \c@mdf@env@i=\count125
23 \c@mdf@env@ii=\count126
24 \c@mdf@zref@counter=\count127
25 Package zref Info: New property: mdf@pagevalue on input line 895.
26 ) (c:/TeXLive/2015/texmf-dist/tex/latex/titlesec/titlesec.sty
27 Package: titlesec 2016/03/21 v2.10.2 Sectioning titles
28 \ttl@box=\box51
29 \beforetitleunit=\skip136
30 \aftertitleunit=\skip137
31 \ttl@plus=\dimen147
32 \ttl@minus=\dimen148
33 \ttl@toksa=\toks30
34 \titlewidth=\dimen149
35 \titlewidthlast=\dimen150
36 \titlewidthfirst=\dimen151
37 ) (c:/TeXLive/2015/texmf-dist/tex/latex/koma-script/scrextend.sty
38 Package: scrextend 2015/10/03 v3.19a KOMA-Script package (extend other
39 classes
40 with features of KOMA-Script classes)
41 (c:/TeXLive/2015/texmf-dist/tex/latex/koma-script/scrkbase.sty
42 Package: scrkbase 2015/10/03 v3.19a KOMA-Script package (KOMA-Script-
43 dependent
44 basics and keyval usage)
45 (c:/TeXLive/2015/texmf-dist/tex/latex/koma-script/scrbase.sty
46 Package: scrbase 2015/10/03 v3.19a KOMA-Script package (KOMA-Script-
47 independent
48 basics and keyval usage)
49 (c:/TeXLive/2015/texmf-dist/tex/latex/koma-script/scrfile.sty
50 Package: scrfile 2015/10/03 v3.19a KOMA-Script package (loading files)
51 Package scrfile, 2015/10/03 v3.19a KOMA-Script package (loading files)
52 Copyright (C) Markus Kohm
53
54
55
56 )))
57 LaTeX Info: Redefining \textsubscript on input line 1277.
58 Package scrextend Info: unexpected definition of \@makefnmark'.
59 (scrextend) Trying to patch it on input line 1391.
60 Package scrextend Info: patch seems to be successfull on input line 1391.
61
62
63
64
65

```

```

1
2
3
4 )
5
6 LaTeX Font Warning: Font shape `T1/cmr/m/n' in size <7.5> not available
7 (Font) size <7> substituted on input line 65.
8
9
10 (c:/TeXLive/2015/texmf-dist/tex/latex/tools/calc.sty
11 Package: calc 2014/10/28 v4.3 Infix arithmetic (KKT,FJ)
12 \calc@Acount=\count128
13 \calc@Bcount=\count129
14 \calc@Adimen=\dimen152
15 \calc@Bdimen=\dimen153
16 \calc@Askip=\skip138
17 \calc@Bskip=\skip139
18 LaTeX Info: Redefining \setlength on input line 80.
19 LaTeX Info: Redefining \addtolength on input line 81.
20 \calc@Ccount=\count130
21 \calc@Cskip=\skip140
22 ) (c:/TeXLive/2015/texmf-dist/tex/latex/geometry/geometry.sty
23 Package: geometry 2010/09/12 v5.6 Page Geometry
24 (c:/TeXLive/2015/texmf-dist/tex/generic/oberdiek/ifvtex.sty
25 Package: ifvtex 2010/03/01 v1.5 Detect VTeX and its facilities (HO)
26 Package ifvtex Info: VTeX not detected.
27 )
28 \Gm@cnth=\count131
29 \Gm@cntv=\count132
30 \c@Gm@tempcnt=\count133
31 \Gm@bindingoffset=\dimen154
32 \Gm@wd@mp=\dimen155
33 \Gm@odd@mp=\dimen156
34 \Gm@even@mp=\dimen157
35 \Gm@layoutwidth=\dimen158
36 \Gm@layoutheight=\dimen159
37 \Gm@layouthoffset=\dimen160
38 \Gm@layoutvoffset=\dimen161
39 \Gm@dimlist=\toks31
40 ) (c:/TeXLive/2015/texmf-dist/tex/latex/hyperref/hyperref.sty
41 Package: hyperref 2012/11/06 v6.83m Hypertext links for LaTeX
42 (c:/TeXLive/2015/texmf-dist/tex/generic/oberdiek/hobsub-hyperref.sty
43 Package: hobsub-hyperref 2012/05/28 v1.13 Bundle oberdiek, subset
44 hyperref (HO)
45
46
47 (c:/TeXLive/2015/texmf-dist/tex/generic/oberdiek/hobsub-generic.sty
48 Package: hobsub-generic 2012/05/28 v1.13 Bundle oberdiek, subset generic
49 (HO)
50 Package: hobsub 2012/05/28 v1.13 Construct package bundles (HO)
51 Package hobsub Info: Skipping package `inwarerr' (already loaded).
52 Package hobsub Info: Skipping package `ltxcmds' (already loaded).
53 Package hobsub Info: Skipping package `ifluatex' (already loaded).
54 Package hobsub Info: Skipping package `ifvtex' (already loaded).
55 Package: intcalc 2007/09/27 v1.1 Expandable calculations with integers
56 (HO)
57
58 Package hobsub Info: Skipping package `ifpdf' (already loaded).
59 Package hobsub Info: Skipping package `etexcmds' (already loaded).
60 Package hobsub Info: Skipping package `kvsetkeys' (already loaded).
61
62
63
64
65

```

1  
2  
3  
4 Package hobsup Info: Skipping package `kvdefinekeys' (already loaded).  
5 Package hobsup Info: Skipping package `pdfTexcmds' (already loaded).  
6 Package: pdfescape 2011/11/25 v1.13 Implements pdfTeX's escape features  
7 (HO)  
8 Package: bigintcalc 2012/04/08 v1.3 Expandable calculations on big  
9 integers (HO  
10 )  
11 Package: bitset 2011/01/30 v1.1 Handle bit-vector datatype (HO)  
12 Package: uniquecounter 2011/01/30 v1.2 Provide unlimited unique counter  
13 (HO)  
14 )  
15 Package hobsup Info: Skipping package `hobsup' (already loaded).  
16 Package: letltxmacro 2010/09/02 v1.4 Let assignment for LaTeX macros (HO)  
17 Package: hopatch 2012/05/28 v1.2 Wrapper for package hooks (HO)  
18 Package: xcolor-patch 2011/01/30 xcolor patch  
19 Package: atveryend 2011/06/30 v1.8 Hooks at the very end of document (HO)  
20 Package hobsup Info: Skipping package `atbegshi' (already loaded).  
21 Package: refcount 2011/10/16 v3.4 Data extraction from label references  
22 (HO)  
23 )  
24 Package: hycolor 2011/01/30 v1.7 Color options for hyperref/bookmark (HO)  
25 )  
26 \@linkdim=\dimen162  
27 \Hy@linkcounter=\count134  
28 \Hy@pagecounter=\count135  
29 (c:/TeXLive/2015/texmf-dist/tex/latex/hyperref/pd1enc.def  
30 File: pd1enc.def 2012/11/06 v6.83m Hyperref: PDFDocEncoding definition  
31 (HO)  
32 Now handling font encoding PD1 ...  
33 ... no UTF-8 mapping file for font encoding PD1  
34 )  
35 \Hy@SavedSpaceFactor=\count136  
36 (c:/TeXLive/2015/texmf-dist/tex/latex/latexconfig/hyperref.cfg  
37 File: hyperref.cfg 2002/06/06 v1.2 hyperref configuration of TeXLive  
38 )  
39 Package hyperref Info: Option `colorlinks' set `true' on input line 4319.  
40 Package hyperref Info: Hyper figures OFF on input line 4443.  
41 Package hyperref Info: Link nesting OFF on input line 4448.  
42 Package hyperref Info: Hyper index ON on input line 4451.  
43 Package hyperref Info: Plain pages OFF on input line 4458.  
44 Package hyperref Info: Backreferencing OFF on input line 4463.  
45 Package hyperref Info: Implicit mode ON; LaTeX internals redefined.  
46 Package hyperref Info: Bookmarks ON on input line 4688.  
47 \c@Hy@tempcnt=\count137  
48 LaTeX Info: Redefining \url on input line 5041.  
49 \XeTeXLinkMargin=\dimen163  
50 \Fld@menulength=\count138  
51 \Field@Width=\dimen164  
52 \Fld@charsize=\dimen165  
53 Package hyperref Info: Hyper figures OFF on input line 6295.  
54 Package hyperref Info: Link nesting OFF on input line 6300.  
55 Package hyperref Info: Hyper index ON on input line 6303.  
56 Package hyperref Info: backreferencing OFF on input line 6310.  
57 Package hyperref Info: Link coloring ON on input line 6313.  
58 Package hyperref Info: Link coloring with OCG OFF on input line 6320.  
59  
60  
61  
62  
63  
64  
65



```
1
2
3
4 Package hyperref Info: PDF/A mode OFF on input line 6325.
5 LaTeX Info: Redefining \ref on input line 6365.
6 LaTeX Info: Redefining \pageref on input line 6369.
7 \Hy@abspage=\count139
8 \c@Item=\count140
9 \c@Hfootnote=\count141
10 )
11
12 Package hyperref Message: Driver (autodetected): hpdftex.
13
14 (c:/TeXLive/2015/texmf-dist/tex/latex/hyperref/hpdftex.def
15 File: hpdftex.def 2012/11/06 v6.83m Hyperref driver for pdfTeX
16 \HyAnn@Count=\count142
17 \Fld@listcount=\count143
18 \c@bookmark@seq@number=\count144
19 (c:/TeXLive/2015/texmf-dist/tex/latex/oberdiek/rerunfilecheck.sty
20 Package: rerunfilecheck 2011/04/15 v1.7 Rerun checks for auxiliary files
21 (HO)
22 Package uniquecounter Info: New unique counter `rerunfilecheck' on input
23 line 2
24 82.
25 )
26 \Hy@SectionHShift=\skip141
27 ) (c:/TeXLive/2015/texmf-dist/tex/latex/preprint/authblk.sty
28 Package: authblk 2001/02/27 1.3 (PWD)
29 \affilsep=\skip142
30 \@affilsep=\skip143
31 \c@Maxaffil=\count145
32 \c@authors=\count146
33 \c@affil=\count147
34 ) (c:/TeXLive/2015/texmf-dist/tex/latex/footmisc/footmisc.sty
35 Package: footmisc 2011/06/06 v5.5b a miscellany of footnote facilities
36 \FN@temptoken=\toks32
37 \footnotemargin=\dimen166
38 \c@pp@next@reset=\count148
39 Package footmisc Info: Declaring symbol style bringhurst on input line
40 855.
41 Package footmisc Info: Declaring symbol style chicago on input line 863.
42 Package footmisc Info: Declaring symbol style wiley on input line 872.
43 Package footmisc Info: Declaring symbol style lampport-robust on input
44 line 883.
45
46 Package footmisc Info: Declaring symbol style lampport* on input line 903.
47 Package footmisc Info: Declaring symbol style lampport*-robust on input
48 line 924
49
50 .
51 ) (c:/TeXLive/2015/texmf-dist/tex/latex/fancyhdr/fancyhdr.sty
52 \fancy@headwidth=\skip144
53 \f@ncyO@elh=\skip145
54 \f@ncyO@erh=\skip146
55 \f@ncyO@olh=\skip147
56 \f@ncyO@orh=\skip148
57 \f@ncyO@elf=\skip149
58 \f@ncyO@erf=\skip150
59
60
61
62
63
64
65
```

```
1
2
3
4 \f@ncyO@olf=\skip151
5 \f@ncyO@orf=\skip152
6 ) (c:/TeXLive/2015/texmf-dist/tex/generic/oberdiek/alphalph.sty
7 Package: alphalph 2011/05/13 v2.4 Convert numbers to letters (HO)
8 )
9 \c@authorfn=\count149
10 (c:/TeXLive/2015/texmf-dist/tex/latex/abstract/abstract.sty
11 Package: abstract 2009/06/08 v1.2a configurable abstracts
12 \abstitlekip=\skip153
13 \absleftindent=\skip154
14 \absrightindent=\skip155
15 \absparindent=\skip156
16 \absparsep=\skip157
17 )
18
19 Package newfloat Info: New float `keypoints' with options
20 `placement=t!,name=kp
21 t' on input line 286.
22 \c@keypoints=\count150
23 \newfloat@ftype=\count151
24 Package newfloat Info: float type `keypoints'=8 on input line 286.
25 (c:/TeXLive/2015/texmf-dist/tex/latex/enumitem/enumitem.sty
26 Package: enumitem 2011/09/28 v3.5.2 Customized lists
27 \labelindent=\skip158
28 \enit@outerparindent=\dimen167
29 \enit@toks=\toks33
30 \enit@inbox=\box52
31 \enitdp@description=\count152
32 ) (c:/TeXLive/2015/texmf-dist/tex/latex/quoting/quoting.sty
33 Package: quoting 2014/01/28 v0.1c Consolidated environment for displayed
34 text
35 \quo@toppartop=\skip159
36 ) (c:/TeXLive/2015/texmf-dist/tex/latex/sttools/stfloats.sty
37 Package: stfloats 2016/02/08 v2.0 Improve float mechanism and
38 baselineskip sett
39 ings
40
41 \@dblbotnum=\count153
42 \c@dblbotnumber=\count154
43 ) (c:/TeXLive/2015/texmf-dist/tex/latex/booktabs/booktabs.sty
44 Package: booktabs 2005/04/14 v1.61803 publication quality tables
45 \heavyrulewidth=\dimen168
46 \lightrulewidth=\dimen169
47 \cmidrulewidth=\dimen170
48 \belowrulesep=\dimen171
49 \belowbottomsep=\dimen172
50 \aboverulesep=\dimen173
51 \abovetopsep=\dimen174
52 \cmidrulesep=\dimen175
53 \cmidrulekern=\dimen176
54 \defaultaddspace=\dimen177
55 \@cmidla=\count155
56 \@cmidlb=\count156
57 \@aboverulesep=\dimen178
58 \@belowrulesep=\dimen179
59 \@thisruleclass=\count157
60
61
62
63
64
65
```

```

1
2
3
4 \@lastruleclass=\count158
5 \@thisrulewidth=\dimen180
6 ) (c:/TeXLive/2015/texmf-dist/tex/latex/tools/tabularx.sty
7 Package: tabularx 2016/02/03 v2.11 `tabularx' package (DPC)
8 \TX@col@width=\dimen181
9 \TX@old@table=\dimen182
10 \TX@old@col=\dimen183
11 \TX@target=\dimen184
12 \TX@delta=\dimen185
13 \TX@cols=\count159
14 \TX@ftn=\toks34
15 )
16 \enitdp@tablenotes=\count160
17 (c:/TeXLive/2015/texmf-dist/tex/latex/caption/caption.sty
18 Package: caption 2016/02/21 v3.3-144 Customizing captions (AR)
19 (c:/TeXLive/2015/texmf-dist/tex/latex/caption/caption3.sty
20 Package: caption3 2016/02/04 v1.7-139 caption3 kernel (AR)
21 Package caption3 Info: TeX engine: e-TeX on input line 67.
22 \captionmargin=\dimen186
23 \captionmargin@=\dimen187
24 \captionwidth=\dimen188
25 \caption@tempdima=\dimen189
26 \caption@indent=\dimen190
27 \caption@parindent=\dimen191
28 \caption@hangindent=\dimen192
29 )
30 \c@ContinuedFloat=\count161
31 Package caption Info: hyperref package is loaded.
32 Package caption Info: rotating package is loaded.
33 ) (c:/TeXLive/2015/texmf-dist/tex/latex/natbib/natbib.sty
34 Package: natbib 2010/09/13 8.31b (PWD, AO)
35 \bibhang=\skip160
36 \bibsep=\skip161
37 LaTeX Info: Redefining \cite on input line 694.
38 \c@NAT@ctr=\count162
39 )) (c:/TeXLive/2015/texmf-dist/tex/latex/siunitx/siunitx.sty
40 Package: siunitx 2016/03/01 v2.6q A comprehensive (SI) units package
41 (c:/TeXLive/2015/texmf-dist/tex/latex/amsmath/amstext.sty
42 Package: amstext 2000/06/29 v2.01 AMS text
43 (c:/TeXLive/2015/texmf-dist/tex/latex/amsmath/amsgen.sty
44 File: amsgen.sty 1999/11/30 v2.0 generic functions
45 \emptytoks=\toks35
46 \ex@=\dimen193
47 )) (c:/TeXLive/2015/texmf-dist/tex/latex/l3packages/l3keys2e/l3keys2e.sty
48 Package: l3keys2e 2016/03/28 v6468 LaTeX2e option processing using LaTeX3
49 keys
50 )
51 \l__siunitx_tmp_box=\box53
52 \l__siunitx_tmp_dim=\dimen194
53 \l__siunitx_tmp_int=\count163
54 \l__siunitx_number_mantissa_length_int=\count164
55 \l__siunitx_number_uncert_length_int=\count165
56 \l__siunitx_round_int=\count166
57 \l__siunitx_process_decimal_int=\count167
58
59
60
61
62
63
64
65

```

```

1
2
3
4 \l__siunitx_process_uncertainty_int=\count168
5 \l__siunitx_process_fixed_int=\count169
6 \l__siunitx_process_integer_min_int=\count170
7 \l__siunitx_process_precision_int=\count171
8 \l__siunitx_group_min_int=\count172
9 \l__siunitx_angle_marker_box=\box54
10 \l__siunitx_angle_unit_box=\box55
11 \l__siunitx_angle_marker_dim=\dimen195
12 \l__siunitx_angle_unit_dim=\dimen196
13 \l__siunitx_unit_int=\count173
14 \l__siunitx_unit_denominator_int=\count174
15 \l__siunitx_unit_numerator_int=\count175
16 \l__siunitx_unit_prefix_int=\count176
17 \l__siunitx_unit_prefix_base_int=\count177
18 \l__siunitx_unit_prefix_gram_int=\count178
19 \l__siunitx_number_product_int=\count179
20 \c_siunitx_one_fill_skip=\skip162
21 \l__siunitx_table_unit_align_skip=\skip163
22 \l__siunitx_table_exponent_dim=\dimen197
23 \l__siunitx_table_integer_dim=\dimen198
24 \l__siunitx_table_mantissa_dim=\dimen199
25 \l__siunitx_table_marker_dim=\dimen256
26 \l__siunitx_table_result_dim=\dimen257
27 \l__siunitx_table_uncert_dim=\dimen258
28 \l__siunitx_table_fill_pre_dim=\dimen259
29 \l__siunitx_table_fill_post_dim=\dimen260
30 \l__siunitx_table_fill_mid_dim=\dimen261
31 \l__siunitx_table_pre_box=\box56
32 \l__siunitx_table_post_box=\box57
33 \l__siunitx_table_mantissa_box=\box58
34 \l__siunitx_table_result_box=\box59
35 \l__siunitx_table_number_align_skip=\skip164
36 \l__siunitx_table_text_align_skip=\skip165
37 .....
38 . LaTeX info: "xparse/define-command"
39 .
40 . Defining command \DeclareBinaryPrefix with sig. 'mmm' on line 7218.
41 .....
42 .....
43 . LaTeX info: "xparse/define-command"
44 .
45 . Defining command \DeclareSIPostPower with sig. 'mm' on line 7221.
46 .....
47 .....
48 . LaTeX info: "xparse/define-command"
49 .
50 . Defining command \DeclareSIPrefix with sig. 'mmm' on line 7224.
51 .....
52 .....
53 . LaTeX info: "xparse/define-command"
54 .
55 . Defining command \DeclareSIPrePower with sig. 'mm' on line 7227.
56 .....
57 .....
58 .....
59 .....
60 .....
61 .....
62 .....
63 .....
64 .....
65 .....

```

```
1
2
3
4 . LaTeX info: "xparse/define-command"
5 .
6 . Defining command \DeclareSIQualifier with sig. 'mm' on line 7230.
7 .....
8 .....
9 . LaTeX info: "xparse/define-command"
10 .
11 . Defining command \DeclareSIUnit with sig. 'O{}mm' on line 7233.
12 .....
13 .....
14 . LaTeX info: "xparse/define-command"
15 .
16 . Defining command \DeclareSIUnitWithOptions with sig. 'mmm' on line
17 7236.
18 .....
19 .....
20 . LaTeX info: "xparse/define-command"
21 .
22 . Defining command \ang with sig. 'o>{\SplitArgument {2}{;}}m' on line
23 7251.
24 .....
25 .....
26 . LaTeX info: "xparse/define-command"
27 .
28 . Defining command \num with sig. 'om' on line 7260.
29 .....
30 .....
31 . LaTeX info: "xparse/define-command"
32 .
33 . Defining command \numlist with sig. 'o>{\SplitList {;}}m' on line 7269.
34 .....
35 .....
36 . LaTeX info: "xparse/define-command"
37 .
38 . Defining command \numrange with sig. 'omm' on line 7278.
39 .....
40 .....
41 . LaTeX info: "xparse/define-command"
42 .
43 . Defining command \SIlist with sig. 'o>{\SplitList {;}}mm' on line 7290.
44 .....
45 .....
46 . LaTeX info: "xparse/define-command"
47 .
48 . Defining command \SIrange with sig. 'ommm' on line 7302.
49 .....
50 .....
51 . LaTeX info: "xparse/define-command"
52 .
53 . Defining command \SI with sig. 'omom' on line 7314.
54 .....
55 .....
56 . LaTeX info: "xparse/define-command"
57 .
58
59
60
61
62
63
64
65
```

```

1
2
3
4 . Defining command \sisetup with sig. 'm' on line 7317.
5 .....
6 .....
7 . LaTeX info: "xparse/define-command"
8 .
9 . Defining command \tablenum with sig. 'om' on line 7332.
10 .....
11 .....
12 . LaTeX info: "xparse/define-command"
13 .
14 . Defining command \si with sig. 'om' on line 7344.
15 .....
16 .....
17 . LaTeX info: "xparse/define-command"
18 .
19 . Defining command \__siunitx_bookmark_num:w with sig. 'om' on line 7391.
20 .....
21 .....
22 . LaTeX info: "xparse/define-command"
23 .
24 . Defining command \__siunitx_bookmark_numrange:w with sig. 'omm' on line
25 . 7393.
26 .....
27 .....
28 . LaTeX info: "xparse/define-command"
29 .
30 . Defining command \__siunitx_bookmark_SI:w with sig. 'omom' on line
31 7395.
32 .....
33 .....
34 . LaTeX info: "xparse/define-command"
35 .
36 . Defining command \__siunitx_bookmark_SIlst:w with sig. 'omm' on line
37 7397.
38 .....
39 .....
40 . LaTeX info: "xparse/define-command"
41 .
42 . Defining command \__siunitx_bookmark_SIrange:w with sig. 'ommm' on line
43 7399.
44 .....
45 .....
46 . LaTeX info: "xparse/define-command"
47 .
48 . Defining command \__siunitx_bookmark_si:w with sig. 'om' on line 7400.
49 .....
50 \g__file_internal_ior=\read1
51 (c:/TeXLive/2015/texmf-dist/tex/latex/beamer/translator/translator.sty
52 Package: translator 2010/06/12 ver 1.10
53
54 (c:/TeXLive/2015/texmf-dist/tex/latex/beamer/translator/translator-
55 language-map
56 pings.tex))) (./main.aux)
57 \openout1 = `main.aux'.
58
59
60
61
62
63
64
65

```

1  
2  
3  
4  
5 LaTeX Font Info: Checking defaults for OML/cmm/m/it on input line 51.  
6 LaTeX Font Info: ... okay on input line 51.  
7 LaTeX Font Info: Checking defaults for T1/cmr/m/n on input line 51.  
8 LaTeX Font Info: ... okay on input line 51.  
9 LaTeX Font Info: Checking defaults for OT1/cmr/m/n on input line 51.  
10 LaTeX Font Info: ... okay on input line 51.  
11 LaTeX Font Info: Checking defaults for OMS/cmsy/m/n on input line 51.  
12 LaTeX Font Info: ... okay on input line 51.  
13 LaTeX Font Info: Checking defaults for OMX/cmex/m/n on input line 51.  
14 LaTeX Font Info: ... okay on input line 51.  
15 LaTeX Font Info: Checking defaults for U/cmr/m/n on input line 51.  
16 LaTeX Font Info: ... okay on input line 51.  
17 LaTeX Font Info: Checking defaults for TS1/cmr/m/n on input line 51.  
18 LaTeX Font Info: Try loading font information for TS1+cmr on input  
19 line 51.  
20 (c:/TeXLive/2015/texmf-dist/tex/latex/base/tslcmr.fd  
21 File: tslcmr.fd 2014/09/29 v2.5h Standard LaTeX font definitions  
22 )  
23 LaTeX Font Info: ... okay on input line 51.  
24 LaTeX Font Info: Checking defaults for PD1/pdf/m/n on input line 51.  
25 LaTeX Font Info: ... okay on input line 51.  
26 LaTeX Font Info: Try loading font information for T1+Merriweather-OsF  
27 on inp  
28 ut line 51.  
29 (c:/TeXLive/2015/texmf-dist/tex/latex/merriweather/tlmerriweather-osf.fd  
30 File: T1Merriweather-OsF.fd 2014/01/22 (autoinst) Font definitions for  
31 T1/Merri  
32 weather-OsF.  
33 )  
34 LaTeX Font Info: Font shape `T1/Merriweather-OsF/m/n' will be  
35 (Font) scaled to size 7.5pt on input line 51.  
36 LaTeX Info: Redefining \microtypecontext on input line 51.  
37 Package microtype Info: Generating PDF output.  
38 Package microtype Info: Character protrusion enabled (level 2).  
39 Package microtype Info: Using default protrusion set `alltext'.  
40 Package microtype Info: Automatic font expansion enabled (level 2),  
41 (microtype) stretch: 20, shrink: 20, step: 1, non-selected.  
42 Package microtype Info: Using default expansion set `basicstext'.  
43 Package microtype Info: No adjustment of tracking.  
44 Package microtype Info: No adjustment of interword spacing.  
45 Package microtype Info: No adjustment of character kerning.  
46 Package microtype Info: Loading generic settings for font family  
47 (microtype) `Merriweather-OsF' (encoding: T1).  
48 (microtype) For optimal results, create family-specific  
49 settings.  
50 (microtype) See the microtype manual for details.  
51 LaTeX Font Info: Redeclaring symbol font `operators' on input line 51.  
52 LaTeX Font Info: Encoding `OT1' has changed to `T1' for symbol font  
53 (Font) `operators' in the math version `normal' on input  
54 line 51.  
55 LaTeX Font Info: Overwriting symbol font `operators' in version  
56 `normal'  
57  
58  
59  
60  
61  
62  
63  
64  
65

```

1
2
3
4 (Font) OT1/cmr/m/n --> T1/Merriweather-OsF/m/n on input
5 line 5
6 1.
7 LaTeX Font Info: Encoding `OT1' has changed to `T1' for symbol font
8 (Font) `operators' in the math version `bold' on input line
9 51.
10 LaTeX Font Info: Overwriting symbol font `operators' in version `bold'
11 (Font) OT1/cmr/bx/n --> T1/Merriweather-OsF/m/n on input
12 line
13 51.
14 LaTeX Font Info: Overwriting symbol font `operators' in version `bold'
15 (Font) T1/Merriweather-OsF/m/n --> T1/Merriweather-
16 OsF/bx/n on
17 input line 51.
18 LaTeX Font Info: Redefining math alphabet \mathbf on input line 51.
19 LaTeX Font Info: Overwriting math alphabet ``\mathbf' in version
20 `normal'
21 (Font) OT1/cmr/bx/n --> T1/Merriweather-OsF/bx/n on
22 input line
23 51.
24 LaTeX Font Info: Overwriting math alphabet ``\mathbf' in version `bold'
25 (Font) OT1/cmr/bx/n --> T1/Merriweather-OsF/bx/n on
26 input line
27 51.
28 LaTeX Font Info: Redefining math alphabet \mathsf on input line 51.
29 LaTeX Font Info: Overwriting math alphabet ``\mathsf' in version
30 `normal'
31 (Font) OT1/cmss/m/n --> T1/MerriweatherSans-TLF/m/n on
32 input l
33 ine 51.
34 LaTeX Font Info: Overwriting math alphabet ``\mathsf' in version `bold'
35 (Font) OT1/cmss/bx/n --> T1/MerriweatherSans-TLF/m/n on
36 input
37 line 51.
38 LaTeX Font Info: Redefining math alphabet \mathit on input line 51.
39 LaTeX Font Info: Overwriting math alphabet ``\mathit' in version
40 `normal'
41 (Font) OT1/cmr/m/it --> T1/Merriweather-OsF/m/it on
42 input line
43 51.
44 LaTeX Font Info: Overwriting math alphabet ``\mathit' in version `bold'
45 (Font) OT1/cmr/bx/it --> T1/Merriweather-OsF/m/it on
46 input lin
47 e 51.
48 LaTeX Font Info: Redefining math alphabet \mathtt on input line 51.
49 LaTeX Font Info: Overwriting math alphabet ``\mathtt' in version
50 `normal'
51 (Font) OT1/cmvt/m/n --> T1/lmvt/m/n on input line 51.
52 LaTeX Font Info: Overwriting math alphabet ``\mathtt' in version `bold'
53 (Font) OT1/cmvt/m/n --> T1/lmvt/m/n on input line 51.
54 LaTeX Font Info: Overwriting math alphabet ``\mathsf' in version `bold'
55 (Font) T1/MerriweatherSans-TLF/m/n -->
56 T1/MerriweatherSans-TLF
57 /bx/n on input line 51.
58
59
60
61
62
63
64
65

```



```

1
2
3
4 LaTeX Font Info: Overwriting math alphabet '\mathit' in version 'bold'
5 (Font) T1/Merriweather-OsF/m/it --> T1/Merriweather-
6 OsF/bx/it
7 on input line 51.
8 \c@mv@tabular=\count180
9 \c@mv@boldtabular=\count181
10 ABD: EverySelectfont initializing macros
11 LaTeX Info: Redefining \selectfont on input line 51.
12 (c:/TeXLive/2015/texmf-dist/tex/context/base/supp-pdf.mkii
13 [Loading MPS to PDF converter (version 2006.09.02).]
14 \scratchcounter=\count182
15 \scratchdimen=\dimen262
16 \scratchbox=\box60
17 \nofMPsegments=\count183
18 \nofMParguments=\count184
19 \everyMPshowfont=\toks36
20 \MPscratchCnt=\count185
21 \MPscratchDim=\dimen263
22 \MPnumerator=\count186
23 \makeMPintoPDFobject=\count187
24 \everyMPtoPDFconversion=\toks37
25 ) (c:/TeXLive/2015/texmf-dist/tex/latex/oberdiek/epstopdf-base.sty
26 Package: epstopdf-base 2010/02/09 v2.5 Base part for package epstopdf
27 (c:/TeXLive/2015/texmf-dist/tex/latex/oberdiek/grfext.sty
28 Package: grfext 2010/08/19 v1.1 Manage graphics extensions (HO)
29 )
30 Package grfext Info: Graphics extension search list:
31 (grfext)
32 [.png,.pdf,.jpg,.mps,.jpeg,.jbig2,.jb2,.PNG,.PDF,.JPG,.JPE
33 G,.JBIG2,.JB2,.eps]
34 (grfext) \AppendGraphicsExtensions on input line 452.
35 (c:/TeXLive/2015/texmf-dist/tex/latex/latexconfig/epstopdf-sys.cfg
36 File: epstopdf-sys.cfg 2010/07/13 v1.3 Configuration of (r)epstopdf for
37 TeX Liv
38 e
39 ))
40 Package lastpage Info: Please have a look at the pageslts package at
41 (lastpage) https://www.ctan.org/pkg/pageslts
42 (lastpage) ! on input line 51.
43 ABD: EveryShipout initializing macros
44 \AtBeginShipoutBox=\box61
45 *geometry* driver: auto-detecting
46 *geometry* detected driver: pdftex
47 *geometry* verbose mode - [ preamble ] result:
48 * driver: pdftex
49 * paper: a4paper
50 * layout: <same size as paper>
51 * layoutoffset: (h,v)=(0.0pt,0.0pt)
52 * modes: includefoot twoside
53 * h-part: (L,W,R)=(54.64pt, 488.22787pt, 54.64pt)
54 * v-part: (T,H,B)=(66.0pt, 745.04684pt, 34.0pt)
55 * \paperwidth=597.50787pt
56 * \paperheight=845.04684pt
57 * \textwidth=488.22787pt
58
59
60
61
62
63
64
65

```

1  
2  
3  
4  
5  
6  
7  
8  
9  
10  
11  
12  
13  
14  
15  
16  
17  
18  
19  
20  
21  
22  
23  
24  
25  
26  
27  
28  
29  
30  
31  
32  
33  
34  
35  
36  
37  
38  
39  
40  
41  
42  
43  
44  
45  
46  
47  
48  
49  
50  
51  
52  
53  
54  
55  
56  
57  
58  
59  
60  
61  
62  
63  
64  
65

```
* \textheight=715.04684pt
* \oddsidemargin=-17.62999pt
* \evensidemargin=-17.62999pt
* \topmargin=-47.76999pt
* \headheight=17.5pt
* \headsep=24.0pt
* \topskip=10.0pt
* \footskip=30.0pt
* \marginparwidth=48.0pt
* \marginparsep=10.0pt
* \columnsep=18.0pt
* \skip\footins=22.0pt plus 2.0pt
* \hoffset=0.0pt
* \voffset=0.0pt
* \mag=1000
* \@twocolumntrue
* \@twosidettrue
* \@mparswitchtrue
* \@reversemarginfalse
* (lin=72.27pt=25.4mm, 1cm=28.453pt)
```

Package hyperref Info: Link coloring ON on input line 51.  
(c:/TeXLive/2015/texmf-dist/tex/latex/hyperref/nameref.sty  
Package: nameref 2012/10/27 v2.43 Cross-referencing by name of section  
(c:/TeXLive/2015/texmf-dist/tex/generic/oberdiek/gettitlestring.sty  
Package: gettitlestring 2010/12/03 v1.4 Cleanup title references (HO

```
)
\c@section@level=\count188
)
```

LaTeX Info: Redefining \ref on input line 51.  
LaTeX Info: Redefining \pageref on input line 51.  
LaTeX Info: Redefining \nameref on input line 51.

```
(./main.out) (./main.out)
\@outlinefile=\write3
\openout3 = `main.out'.
```

```
\@gscitedetails=\box62
\@gscitedetailsheight=\skip166
\@gsheadbox=\box63
\@gsheadboxheight=\skip167
```

LaTeX Font Info: Font shape `T1/Merriweather-OsF/b/n' will be  
(Font) scaled to size 6.5pt on input line 51.  
LaTeX Font Info: Calculating math sizes for size <7.5> on input line  
51.  
LaTeX Font Info: Font shape `T1/Merriweather-OsF/m/n' will be  
(Font) scaled to size 6.24973pt on input line 51.  
LaTeX Font Info: Font shape `T1/Merriweather-OsF/m/n' will be  
(Font) scaled to size 5.24997pt on input line 51.  
LaTeX Font Info: Try loading font information for U+eur on input line  
51.

```
(c:/TeXLive/2015/texmf-dist/tex/latex/amsfonts/ueur.fd
File: ueur.fd 2013/01/14 v3.01 Euler Roman
) (c:/TeXLive/2015/texmf-dist/tex/latex/microtype/mt-eur.cfg
```

1  
2  
3  
4 File: mt-eur.cfg 2006/07/31 v1.1 microtype config. file: AMS Euler Roman  
5 (RS)  
6 )  
7  
8 LaTeX Font Warning: Font shape `OMS/cmsy/m/n' in size <7.5> not available  
9 (Font) size <7> substituted on input line 51.  
10  
11 LaTeX Font Info: External font `cmex10' loaded for size  
12 (Font) <7.5> on input line 51.  
13 LaTeX Font Info: External font `cmex10' loaded for size  
14 (Font) <6.24973> on input line 51.  
15 LaTeX Font Info: External font `cmex10' loaded for size  
16 (Font) <5.24997> on input line 51.  
17 LaTeX Font Info: Try loading font information for U+euf on input line  
18 51.  
19 (c:/TeXLive/2015/texmf-dist/tex/latex/amsfonts/ueuf.fd  
20 File: ueuf.fd 2013/01/14 v3.01 Euler Fraktur  
21 ) (c:/TeXLive/2015/texmf-dist/tex/latex/microtype/mt-euf.cfg  
22 File: mt-euf.cfg 2006/07/03 v1.1 microtype config. file: AMS Euler  
23 Fraktur (RS)  
24 )  
25  
26 LaTeX Font Info: Try loading font information for U+eus on input line  
27 51.  
28 (c:/TeXLive/2015/texmf-dist/tex/latex/amsfonts/ueus.fd  
29 File: ueus.fd 2013/01/14 v3.01 Euler Script  
30 ) (c:/TeXLive/2015/texmf-dist/tex/latex/microtype/mt-eus.cfg  
31 File: mt-eus.cfg 2006/07/28 v1.2 microtype config. file: AMS Euler Script  
32 (RS)  
33 )  
34  
35 LaTeX Font Info: Try loading font information for U+euex on input line  
36 51.  
37 (c:/TeXLive/2015/texmf-dist/tex/latex/amsfonts/ueuex.fd  
38 File: ueuex.fd 2013/01/14 v3.01 Euler extra symbols  
39 )  
40  
41  
42 LaTeX Font Warning: Font shape `OML/cmm/m/it' in size <7.5> not available  
43 (Font) size <7> substituted on input line 51.  
44  
45 LaTeX Font Info: Font shape `T1/Merriweather-OsF/m/it' will be  
46 (Font) scaled to size 7.5pt on input line 51.  
47 LaTeX Font Info: Font shape `T1/Merriweather-OsF/m/it' will be  
48 (Font) scaled to size 6.24973pt on input line 51.  
49 LaTeX Font Info: Font shape `T1/Merriweather-OsF/m/it' will be  
50 (Font) scaled to size 5.24997pt on input line 51.  
51 LaTeX Font Info: Font shape `T1/Merriweather-OsF/m/n' will be  
52 (Font) scaled to size 8.0pt on input line 51.  
53 LaTeX Font Info: Font shape `T1/Merriweather-OsF/m/it' will be  
54 (Font) scaled to size 8.0pt on input line 51.  
55 LaTeX Font Info: Font shape `T1/Merriweather-OsF/b/it' will be  
56 (Font) scaled to size 8.0pt on input line 51.  
57  
58 Package caption Info: Begin \AtBeginDocument code.  
59 Package caption Info: End \AtBeginDocument code.  
60  
61  
62  
63  
64  
65

```

1
2
3
4 (c:/TeXLive/2015/texmf-dist/tex/latex/beamer/translator/dicts/translator-
5 basic-
6 dictionary/translator-basic-dictionary-English.dict
7 Dictionary: translator-basic-dictionary, Language: English
8 ) (c:/TeXLive/2015/texmf-dist/tex/latex/siunitx/siunitx-abbreviations.cfg
9 File: siunitx-abbreviations.cfg 2016/03/01 v2.6q siunitx: Abbreviated
10 units
11 )
12 \c__siunitx_mathsf_int=\count189
13 LaTeX Font Info: Try loading font information for T1+MerriweatherSans-
14 TLF on
15 input line 51.
16 (c:/TeXLive/2015/texmf-dist/tex/latex/merriweather/tlmerriweathersans-
17 tlf.fd
18 File: T1MerriweatherSans-TLF.fd 2014/01/22 (autoinst) Font definitions
19 for T1/M
20 erriweatherSans-TLF.
21 )
22 LaTeX Font Info: Font shape `T1/MerriweatherSans-TLF/m/n' will be
23 (Font) scaled to size 7.5pt on input line 51.
24 Package microtype Info: Loading generic settings for font family
25 (microtype) `MerriweatherSans-TLF' (encoding: T1).
26 (microtype) For optimal results, create family-specific
27 settings.
28 (microtype) See the microtype manual for details.
29 LaTeX Font Info: Font shape `T1/MerriweatherSans-TLF/m/n' will be
30 (Font) scaled to size 6.24973pt on input line 51.
31 LaTeX Font Info: Font shape `T1/MerriweatherSans-TLF/m/n' will be
32 (Font) scaled to size 5.24997pt on input line 51.
33 \c__siunitx_mathtt_int=\count190
34 LaTeX Font Info: Try loading font information for T1+lmtt on input
35 line 51.
36 (c:/TeXLive/2015/texmf-dist/tex/latex/lm/t1lmtt.fd
37 File: t1lmtt.fd 2009/10/30 v1.6 Font defs for Latin Modern
38 )
39 Package microtype Info: Loading generic settings for font family
40 (microtype) `lmtt' (encoding: T1).
41 (microtype) For optimal results, create family-specific
42 settings.
43 (microtype) See the microtype manual for details.
44 TextBlockOrigin set to 4pc+6.64pt x 4pc+6pt
45 ! Undefined control sequence.
46 <argument> \@ouplogo
47
48
49
50 1.63 \end{frontmatter}
51
52
53
54
55
56
57
58
59
60
61
62
63
64
65

```

The control sequence at the end of the top line of your error message was never \def'ed. If you have misspelled it (e.g., `\hobx'`), type `\I` and the correct spelling (e.g., `\I\hbox'`). Otherwise just continue, and I'll forget about whatever was undefined.

1  
2  
3  
4  
5  
6  
7  
8  
9  
10  
11  
12  
13  
14  
15  
16  
17  
18  
19  
20  
21  
22  
23  
24  
25  
26  
27  
28  
29  
30  
31  
32  
33  
34  
35  
36  
37  
38  
39  
40  
41  
42  
43  
44  
45  
46  
47  
48  
49  
50  
51  
52  
53  
54  
55  
56  
57  
58  
59  
60  
61  
62  
63  
64  
65

LaTeX Warning: Command \textasciicute invalid in math mode on input line 63.

LaTeX Font Info: Try loading font information for TS1+Merriweather-OsF on input line 63.

(c:/TeXLive/2015/texmf-dist/tex/latex/merriweather/ts1merriweather-osf.fd  
File: TS1Merriweather-OsF.fd 2014/01/22 (autoinst) Font definitions for TS1/Merriweather-OsF.)

LaTeX Font Info: Font shape `TS1/Merriweather-OsF/m/n' will be (Font) scaled to size 7.5pt on input line 63.

Package microtype Info: Loading generic settings for font family (microtype) `Merriweather-OsF' (encoding: TS1). (microtype) For optimal results, create family-specific settings. (microtype) See the microtype manual for details.

LaTeX Warning: Command \textasciicute invalid in math mode on input line 63.

! Extra }, or forgotten \$.  
\TP@commonendtextblock ...oxrulesize }\fi \egroup \TP@prevdepth  
=\prevdepth ...  
1.63 \end{frontmatter}

I've deleted a group-closing symbol because it seems to be spurious, as in ``$x}$'`. But perhaps the `}` is legitimate and you forgot something else, as in ``\hbox{$x}'`. In such cases the way to recover is to insert both the forgotten and the deleted material, e.g., by typing ``I$'`.

! Improper \prevdepth.  
\TP@commonendtextblock ...P@prevdepth =\prevdepth \prevdepth =-1000pt  
\expan...  
1.63 \end{frontmatter}

You can refer to `\spacefactor` only in horizontal mode; you can refer to `\prevdepth` only in vertical mode; and neither of these is meaningful inside `\write`. So I'm forgetting what you said and using zero instead.

! You can't use `\prevdepth` in math mode.  
\TP@commonendtextblock ... =\prevdepth \prevdepth =-1000pt \expandafter  
\TP@...  
1.63 \end{frontmatter}

Sorry, but I'm not programmed to handle this case; I'll just pretend that you didn't ask for it. If you're in the wrong mode, you might be able to

1  
2  
3  
4  
5  
6  
7  
8  
9  
10  
11  
12  
13  
14  
15  
16  
17  
18  
19  
20  
21  
22  
23  
24  
25  
26  
27  
28  
29  
30  
31  
32  
33  
34  
35  
36  
37  
38  
39  
40  
41  
42  
43  
44  
45  
46  
47  
48  
49  
50  
51  
52  
53  
54  
55  
56  
57  
58  
59  
60  
61  
62  
63  
64  
65

return to the right one by typing ``I}'` or ``I$'` or ``I\par'`.

! Missing \$ inserted.

<inserted text>

\$

1.63 \end{frontmatter}

I've inserted something that you may have forgotten.

(See the <inserted text> above.)

With luck, this will get me unwedged. But if you really didn't forget anything, try typing ``2'` now; then my insertion and my current dilemma will both disappear.

! Missing } inserted.

<inserted text>

}

1.63 \end{frontmatter}

I've inserted something that you may have forgotten.

(See the <inserted text> above.)

With luck, this will get me unwedged. But if you really didn't forget anything, try typing ``2'` now; then my insertion and my current dilemma will both disappear.

Overfull \hbox (54.64pt too wide) in paragraph at lines 63--63

[[[

]]

LaTeX Font Info: Font shape ``T1/Merriweather-OsF/m/n'` will be scaled to size 14.0pt on input line 63.  
(Font)  
LaTeX Font Info: Font shape ``T1/Merriweather-OsF/m/n'` will be scaled to size 8.99997pt on input line 63.  
(Font)  
LaTeX Font Info: Font shape ``T1/Merriweather-OsF/b/n'` will be scaled to size 18.0pt on input line 63.  
(Font)  
LaTeX Font Info: Font shape ``T1/Merriweather-OsF/m/n'` will be scaled to size 13.0pt on input line 63.  
(Font)  
LaTeX Font Info: Calculating math sizes for size <13> on input line 63.  
LaTeX Font Info: Font shape ``T1/Merriweather-OsF/m/n'` will be scaled to size 10.83287pt on input line 63.  
(Font)  
LaTeX Font Info: Font shape ``T1/Merriweather-OsF/m/n'` will be scaled to size 9.09996pt on input line 63.  
(Font)

LaTeX Font Warning: Font shape ``OMS/cmsy/m/n'` in size <13> not available (Font) size <12> substituted on input line 63.

LaTeX Font Info: External font ``cmex10'` loaded for size <13> on input line 63.  
(Font)  
LaTeX Font Info: External font ``cmex10'` loaded for size <10.83287> on input line 63.  
(Font)  
LaTeX Font Info: External font ``cmex10'` loaded for size <9.09996> on input line 63.  
(Font)

1  
2  
3  
4  
5  
6  
7  
8  
9  
10  
11  
12  
13  
14  
15  
16  
17  
18  
19  
20  
21  
22  
23  
24  
25  
26  
27  
28  
29  
30  
31  
32  
33  
34  
35  
36  
37  
38  
39  
40  
41  
42  
43  
44  
45  
46  
47  
48  
49  
50  
51  
52  
53  
54  
55  
56  
57  
58  
59  
60  
61  
62  
63  
64  
65

LaTeX Font Warning: Font shape `OML/cmm/m/it' in size <13> not available (Font) size <12> substituted on input line 63.

LaTeX Font Info: Font shape `T1/Merriweather-OsF/m/it' will be scaled to size 13.0pt on input line 63. (Font)

LaTeX Font Info: Font shape `T1/Merriweather-OsF/m/it' will be scaled to size 10.83287pt on input line 63. (Font)

LaTeX Font Info: Font shape `T1/Merriweather-OsF/m/it' will be scaled to size 9.09996pt on input line 63. (Font)

LaTeX Font Info: Font shape `T1/MerriweatherSans-TLF/m/n' will be scaled to size 13.0pt on input line 63. (Font)

LaTeX Font Info: Font shape `T1/MerriweatherSans-TLF/m/n' will be scaled to size 10.83287pt on input line 63. (Font)

LaTeX Font Info: Font shape `T1/MerriweatherSans-TLF/m/n' will be scaled to size 9.09996pt on input line 63. (Font)

LaTeX Font Info: Font shape `TS1/Merriweather-OsF/m/n' will be scaled to size 10.83287pt on input line 63. (Font)

LaTeX Font Info: Font shape `T1/Merriweather-OsF/m/n' will be scaled to size 9.0pt on input line 63. (Font)

LaTeX Font Info: Font shape `T1/Merriweather-OsF/m/n' will be scaled to size 7.0pt on input line 63. (Font)

LaTeX Font Info: Font shape `T1/Merriweather-OsF/m/n' will be scaled to size 5.0pt on input line 63. (Font)

LaTeX Font Info: External font `cmex10' loaded for size <9> on input line 63. (Font)

LaTeX Font Info: External font `cmex10' loaded for size <7> on input line 63. (Font)

LaTeX Font Info: External font `cmex10' loaded for size <5> on input line 63. (Font)

LaTeX Font Info: Font shape `T1/Merriweather-OsF/m/it' will be scaled to size 9.0pt on input line 63. (Font)

LaTeX Font Info: Font shape `T1/Merriweather-OsF/m/it' will be scaled to size 7.0pt on input line 63. (Font)

LaTeX Font Info: Font shape `T1/Merriweather-OsF/m/it' will be scaled to size 5.0pt on input line 63. (Font)

LaTeX Font Info: Font shape `T1/MerriweatherSans-TLF/m/n' will be scaled to size 9.0pt on input line 63. (Font)

LaTeX Font Info: Font shape `T1/MerriweatherSans-TLF/m/n' will be scaled to size 7.0pt on input line 63. (Font)

LaTeX Font Info: Font shape `T1/MerriweatherSans-TLF/m/n' will be scaled to size 5.0pt on input line 63. (Font)

LaTeX Font Info: Font shape `T1/Merriweather-OsF/m/n' will be scaled to size 6.5pt on input line 63. (Font)

LaTeX Font Info: Calculating math sizes for size <6.5> on input line 63. (Font)

LaTeX Font Info: Font shape `T1/Merriweather-OsF/m/n' will be scaled to size 5.41643pt on input line 63. (Font)

LaTeX Font Info: Font shape `T1/Merriweather-OsF/m/n' will be scaled to size 4.54997pt on input line 63. (Font)

LaTeX Font Warning: Font shape `OMS/cmsy/m/n' in size <6.5> not available (Font) size <6> substituted on input line 63.

1  
2  
3  
4 LaTeX Font Warning: Font shape `OMS/cmsy/m/n' in size <5.41643> not  
5 available  
6 (Font) size <5> substituted on input line 63.  
7  
8  
9 LaTeX Font Warning: Font shape `OMS/cmsy/m/n' in size <4.54997> not  
10 available  
11 (Font) size <5> substituted on input line 63.  
12  
13 LaTeX Font Info: External font `cmex10' loaded for size  
14 (Font) <6.5> on input line 63.  
15 LaTeX Font Info: External font `cmex10' loaded for size  
16 (Font) <5.41643> on input line 63.  
17 LaTeX Font Info: External font `cmex10' loaded for size  
18 (Font) <4.54997> on input line 63.  
19  
20  
21 LaTeX Font Warning: Font shape `OML/cmm/m/it' in size <6.5> not available  
22 (Font) size <6> substituted on input line 63.  
23  
24  
25 LaTeX Font Warning: Font shape `OML/cmm/m/it' in size <5.41643> not  
26 available  
27 (Font) size <5> substituted on input line 63.  
28  
29  
30 LaTeX Font Warning: Font shape `OML/cmm/m/it' in size <4.54997> not  
31 available  
32 (Font) size <5> substituted on input line 63.  
33  
34  
35 LaTeX Font Info: Font shape `T1/Merriweather-OsF/m/it' will be  
36 (Font) scaled to size 6.5pt on input line 63.  
37 LaTeX Font Info: Font shape `T1/Merriweather-OsF/m/it' will be  
38 (Font) scaled to size 5.41643pt on input line 63.  
39 LaTeX Font Info: Font shape `T1/Merriweather-OsF/m/it' will be  
40 (Font) scaled to size 4.54997pt on input line 63.  
41 LaTeX Font Info: Font shape `T1/MerriweatherSans-TLF/m/n' will be  
42 (Font) scaled to size 6.5pt on input line 63.  
43 LaTeX Font Info: Font shape `T1/MerriweatherSans-TLF/m/n' will be  
44 (Font) scaled to size 5.41643pt on input line 63.  
45 LaTeX Font Info: Font shape `T1/MerriweatherSans-TLF/m/n' will be  
46 (Font) scaled to size 4.54997pt on input line 63.  
47 LaTeX Font Info: Font shape `TS1/Merriweather-OsF/m/n' will be  
48 (Font) scaled to size 5.41643pt on input line 63.  
49  
50 Overfull \hbox (54.64pt too wide) in paragraph at lines 63--63  
51 [][][]  
52 []  
53  
54  
55 LaTeX Font Info: Font shape `T1/Merriweather-OsF/b/n' will be  
56 (Font) scaled to size 10.0pt on input line 63.  
57 LaTeX Font Info: Font shape `T1/Merriweather-OsF/b/n' will be  
58 (Font) scaled to size 8.0pt on input line 63.  
59  
60 Overfull \hbox (54.64pt too wide) in paragraph at lines 63--63  
61  
62  
63  
64  
65



1  
2  
3  
4  
5  
6  
7  
8  
9  
10  
11  
12  
13  
14  
15  
16  
17  
18  
19  
20  
21  
22  
23  
24  
25  
26  
27  
28  
29  
30  
31  
32  
33  
34  
35  
36  
37  
38  
39  
40  
41  
42  
43  
44  
45  
46  
47  
48  
49  
50  
51  
52  
53  
54  
55  
56  
57  
58  
59  
60  
61  
62  
63  
64  
65

```
[ ] [ ] [ ]  
[ ]
```

Package mdfamed Info: mdfamed works in twoside mode on input line 66.

LaTeX Font Info: Font shape `T1/Merriweather-OsF/b/n' will be  
(Font) scaled to size 8.2pt on input line 66.

LaTeX Font Info: Font shape `T1/Merriweather-OsF/b/n' will be  
(Font) scaled to size 7.5pt on input line 72.

Package mdfamed Info: mdfamed inside float  
mdfamed uses option nobreak mdfamed on input line 79.

Package mdfamed Info: mdfamed inside a box  
mdfamed uses option nobreak mdfamed on input line 79.

Package natbib Warning: Citation `Sandberg2014-dq' on page 1 undefined on  
input  
line 83.

Package natbib Warning: Citation `Zheng2017-zx' on page 1 undefined on  
input li  
ne 83.

Package natbib Warning: Citation `Rosenberg2018-aj' on page 1 undefined  
on inpu  
t line 83.

Package natbib Warning: Citation `Wagner2016-ga' on page 1 undefined on  
input l  
ine 83.

Package natbib Warning: Citation `Regev2017-hc' on page 1 undefined on  
input li  
ne 83.

Package natbib Warning: Citation `Parekh2016-lk' on page 1 undefined on  
input l  
ine 84.

Package natbib Warning: Citation `Kivioja2012-cy' on page 1 undefined on  
input  
line 84.

Package natbib Warning: Citation `Ziegenhain2017-ww' on page 1 undefined  
on inp  
ut line 84.

1  
2  
3  
4 Package natbib Warning: Citation `Vieth2017-yl' on page 1 undefined on  
5 input line 84.  
6  
7  
8  
9 Package natbib Warning: Citation `Ziegenhain2018-qz' on page 1 undefined  
10 on input line 85.  
11  
12  
13  
14 Package natbib Warning: Citation `Parekh2016-lk' on page 1 undefined on  
15 input line 85.  
16  
17  
18  
19 Package natbib Warning: Citation `Lake2016-ql' on page 1 undefined on  
20 input line 86.  
21  
22  
23  
24  
25 Package natbib Warning: Citation `Habib2017-sn' on page 1 undefined on  
26 input line 86.  
27  
28  
29  
30 Package natbib Warning: Citation `Lake2016-ql' on page 1 undefined on  
31 input line 86.  
32  
33  
34  
35 Package natbib Warning: Citation `Macosko2015-yd' on page 1 undefined on  
36 input line 87.  
37  
38  
39  
40  
41 Package natbib Warning: Citation `Svensson2017-gy' on page 1 undefined on  
42 input line 87.  
43  
44  
45  
46 Package natbib Warning: Citation `Hashimshony2016-nk' on page 1 undefined  
47 on input line 87.  
48  
49  
50  
51 Package natbib Warning: Citation `Petukhov2017-ui' on page 1 undefined on  
52 input line 87.  
53  
54  
55  
56 Underfull \vbox (badness 10000) has occurred while \output is active []  
57  
58  
59 Underfull \vbox (badness 10000) has occurred while \output is active []  
60  
61  
62  
63  
64  
65

1  
2  
3  
4  
5  
6  
7  
8  
9  
10  
11  
12  
13  
14  
15  
16  
17  
18  
19  
20  
21  
22  
23  
24  
25  
26  
27  
28  
29  
30  
31  
32  
33  
34  
35  
36  
37  
38  
39  
40  
41  
42  
43  
44  
45  
46  
47  
48  
49  
50  
51  
52  
53  
54  
55  
56  
57  
58  
59  
60  
61  
62  
63  
64  
65

LaTeX Font Info: Font shape `T1/Merriweather-OsF/m/n' will be  
(Font) scaled to size 7.8pt on input line 88.  
LaTeX Font Info: Font shape `T1/Merriweather-OsF/b/n' will be  
(Font) scaled to size 7.8pt on input line 88.  
[l{c:/TeXLive/2015/texmf-var/fonts/map/pdftex/updmap/pdftex.map}]

] LaTeX Font Info: Font shape `T1/Merriweather-OsF/b/n' will be  
(Font) scaled to size 8.5pt on input line 89.

Package natbib Warning: Citation `Soumillon2014-hd' on page 2 undefined  
on input line 92.

Package natbib Warning: Citation `Jaitin2014-na' on page 2 undefined on  
input line 92.

Package natbib Warning: Citation `Macosko2015-yd' on page 2 undefined on  
input line 92.

Package natbib Warning: Citation `Hashimshony2016-nk' on page 2 undefined  
on input line 92.

Package natbib Warning: Citation `Rosenberg2018-aj' on page 2 undefined  
on input line 92.

Package natbib Warning: Citation `Zheng2017-zx' on page 2 undefined on  
input line 92.

Package natbib Warning: Citation `Habib2017-sn' on page 2 undefined on  
input line 92.

Package natbib Warning: Citation `Klein2015-mj' on page 2 undefined on  
input line 92.

Package natbib Warning: Citation `Zilionis2017-ox' on page 2 undefined on  
input

1  
2  
3  
4  
5  
6  
7  
8  
9  
10  
11  
12  
13  
14  
15  
16  
17  
18  
19  
20  
21  
22  
23  
24  
25  
26  
27  
28  
29  
30  
31  
32  
33  
34  
35  
36  
37  
38  
39  
40  
41  
42  
43  
44  
45  
46  
47  
48  
49  
50  
51  
52  
53  
54  
55  
56  
57  
58  
59  
60  
61  
62  
63  
64  
65

line 92.

Package natbib Warning: Citation 'Hochgerner2017-wt' on page 2 undefined on input line 92.

LaTeX Font Info: Font shape 'T1/Merriweather-OsF/b/sl' in size <7.5> not available (Font) Font shape 'T1/Merriweather-OsF/b/it' tried instead on input line 96.

LaTeX Font Info: Font shape 'T1/Merriweather-OsF/b/it' will be scaled to size 7.5pt on input line 96.

Package natbib Warning: Citation 'Dobin2013-ha' on page 2 undefined on input line 100.

Package natbib Warning: Citation 'Liao2014-pg' on page 2 undefined on input line 103.

Package natbib Warning: Citation 'data.table-xy' on page 2 undefined on input line 103.

Package natbib Warning: Citation 'Smith2017-xd' on page 2 undefined on input line 105.

Package natbib Warning: Citation 'Smith2017-xd' on page 2 undefined on input line 105.

Package natbib Warning: Citation 'Smith2017-xd' on page 2 undefined on input line 107.

Package natbib Warning: Citation 'Macosko2015-yd' on page 2 undefined on input line 107.

! Undefined control sequence.  
l.111 ...distribution using the R-package \textttt {mclust}  
\cite{Fraleley2002-...

1  
2  
3  
4  
5  
6  
7  
8  
9  
10  
11  
12  
13  
14  
15  
16  
17  
18  
19  
20  
21  
22  
23  
24  
25  
26  
27  
28  
29  
30  
31  
32  
33  
34  
35  
36  
37  
38  
39  
40  
41  
42  
43  
44  
45  
46  
47  
48  
49  
50  
51  
52  
53  
54  
55  
56  
57  
58  
59  
60  
61  
62  
63  
64  
65

The control sequence at the end of the top line of your error message was never \def'ed. If you have misspelled it (e.g., \hobx'), type `I' and the correct spelling (e.g., `I\hbox'). Otherwise just continue, and I'll forget about whatever was undefined.

Package natbib Warning: Citation `Fraley2002-wc' on page 2 undefined on input line 111.

Package natbib Warning: Citation `Fraley2012-bb' on page 2 undefined on input line 111.

Package natbib Warning: Citation `Habib2017-sn' on page 2 undefined on input line 112.

LaTeX Font Info: Font shape `T1/Merriweather-OsF/m/it' will be (Font) scaled to size 7.8pt on input line 114.

Overfull \hbox (253.11394pt too wide) has occurred while \output is active  
[[  
[  
[2]

Package natbib Warning: Citation `Vallejos2017-gp' on page 3 undefined on input line 117.

Package natbib Warning: Citation `Evans2017-hj' on page 3 undefined on input line 117.

Package natbib Warning: Citation `Grun2015-tk' on page 3 undefined on input line 117.

Package natbib Warning: Citation `Ziegenhain2017-ww' on page 3 undefined on input line 119.

Package natbib Warning: Citation `Svensson2017-gy' on page 3 undefined on input line 119.

1  
2  
3  
4  
5  
6  
7  
8  
9  
10  
11  
12  
13  
14  
15  
16  
17  
18  
19  
20  
21  
22  
23  
24  
25  
26  
27  
28  
29  
30  
31  
32  
33  
34  
35  
36  
37  
38  
39  
40  
41  
42  
43  
44  
45  
46  
47  
48  
49  
50  
51  
52  
53  
54  
55  
56  
57  
58  
59  
60  
61  
62  
63  
64  
65

Package natbib Warning: Citation `Hendriks2014-lj' on page 3 undefined on input line 131.

Package natbib Warning: Citation `Gaidatzis2015-lx' on page 3 undefined on input line 131.

Package natbib Warning: Citation `La\_Manno2017-mu' on page 3 undefined on input line 131.

Package natbib Warning: Citation `Habib2017-sn' on page 3 undefined on input line 131.

Package natbib Warning: Citation `Lake2016-ql' on page 3 undefined on input line 132.

Package natbib Warning: Citation `Lake2017-dn' on page 3 undefined on input line 132.

Package natbib Warning: Citation `Satija2015-nn' on page 3 undefined on input line 132.

Package natbib Warning: Citation `Butler2017-kv' on page 3 undefined on input line 132.

Package natbib Warning: Citation `Tasic2016-ms' on page 3 undefined on input line 136.

Package natbib Warning: Citation `Tasic2016-ms' on page 3 undefined on input line 137.

Package natbib Warning: Citation `Vieth2017-yl' on page 3 undefined on input line 137.

1  
2  
3  
4 ne 139.  
5  
6  
7 Package natbib Warning: Citation `Habib2017-sn' on page 3 undefined on  
8 input li  
9 ne 139.  
10  
11  
12 Package natbib Warning: Citation `The\_Tabula\_Muris\_Consortium2018-wm' on  
13 page 3  
14 undefined on input line 139.  
15  
16  
17  
18 Package natbib Warning: Citation `Han2018-ce' on page 3 undefined on  
19 input line  
20 139.  
21  
22  
23 Overfull \hbox (253.11394pt too wide) has occurred while \output is  
24 active  
25 [[]]  
26 []  
27  
28 [3]  
29  
30 Package natbib Warning: Citation `Bagnoli2017-ex' on page 4 undefined on  
31 input  
32 line 155.  
33  
34  
35 Underfull \hbox (badness 3039) in paragraph at lines 153--156  
36 \T1/Merriweather-OsF/m/n/7.5 Serum (Thermo Fisher) and 1 % Peni-  
37 cillin/Streptom  
38 ycin  
39 []  
40  
41  
42  
43 Package natbib Warning: Citation `Zheng2017-zx' on page 4 undefined on  
44 input li  
45 ne 157.  
46  
47  
48 Package natbib Warning: Citation `Habib2017-sn' on page 4 undefined on  
49 input li  
50 ne 159.  
51  
52  
53 Package natbib Warning: Citation `noauthor\_undated-nd' on page 4  
54 undefined on i  
55 nput line 159.  
56  
57  
58  
59 Package natbib Warning: Citation `Vieth2017-yl' on page 4 undefined on  
60 input li  
61  
62  
63  
64  
65

1  
2  
3  
4  
5  
6  
7  
8  
9  
10  
11  
12  
13  
14  
15  
16  
17  
18  
19  
20  
21  
22  
23  
24  
25  
26  
27  
28  
29  
30  
31  
32  
33  
34  
35  
36  
37  
38  
39  
40  
41  
42  
43  
44  
45  
46  
47  
48  
49  
50  
51  
52  
53  
54  
55  
56  
57  
58  
59  
60  
61  
62  
63  
64  
65

ne 164.

Package natbib Warning: Citation `Law2014-yx' on page 4 undefined on  
input line  
164.

Package natbib Warning: Citation `Lun2016-qr' on page 4 undefined on  
input line  
164.

Package natbib Warning: Citation `Soneson2018-ms' on page 4 undefined on  
input  
line 166.

Package natbib Warning: Citation `Habib2017-sn' on page 4 undefined on  
input li  
ne 170.

Package natbib Warning: Citation `Satija2015-nn' on page 4 undefined on  
input l  
ine 170.

Package natbib Warning: Citation `Butler2017-kv' on page 4 undefined on  
input l  
ine 170.

Package natbib Warning: Citation `Macosko2015-yd' on page 4 undefined on  
input  
line 174.

Package natbib Warning: Citation `Smith2017-xd' on page 4 undefined on  
input li  
ne 174.

Overfull \hbox (253.11394pt too wide) has occurred while \output is  
active

[][]  
[]

[4]

Package natbib Warning: Citation `Parekh2018-db' on page 5 undefined on  
input l  
ine 192.



1  
2  
3  
4  
5  
6  
7  
8  
9  
10  
11  
12  
13  
14  
15  
16  
17  
18  
19  
20  
21  
22  
23  
24  
25  
26  
27  
28  
29  
30  
31  
32  
33  
34  
35  
36  
37  
38  
39  
40  
41  
42  
43  
44  
45  
46  
47  
48  
49  
50  
51  
52  
53  
54  
55  
56  
57  
58  
59  
60  
61  
62  
63  
64  
65

Underfull \hbox (badness 10000) in paragraph at lines 197--201

[]

No file main.bbl.

Package epstopdf Info: Source file: <zUMI\_pipeline.eps>  
(epstopdf) date: 2018-04-22 10:19:55  
(epstopdf) size: 10640774 bytes  
(epstopdf) Output file: <zUMI\_pipeline-eps-converted-to.pdf>  
(epstopdf) date: 2018-04-22 10:20:17  
(epstopdf) size: 1667698 bytes  
(epstopdf) Command: <repstopdf --outfile=zUMI\_pipeline-eps-converted-to.pdf zUMI\_pipeline.eps>

(epstopdf) \includegraphics on input line 225.

Package epstopdf Info: Output file is already uptodate.

<zUMI\_pipeline-eps-converted-to.pdf, id=148, 2137.9875pt x 723.70375pt>

File: zUMI\_pipeline-eps-converted-to.pdf Graphic file (type pdf)

<use zUMI\_pipeline-eps-converted-to.pdf>

Package pdftex.def Info: zUMI\_pipeline-eps-converted-to.pdf used on input line 225.

(pdftex.def) Requested size: 463.81499pt x 156.99571pt.

LaTeX Font Info: Font shape `T1/Merriweather-OsF/m/n' will be scaled to size 6.0pt on input line 227.

LaTeX Font Info: Font shape `T1/Merriweather-OsF/b/n' will be scaled to size 6.0pt on input line 227.

LaTeX Font Info: Font shape `T1/Merriweather-OsF/m/it' will be scaled to size 6.0pt on input line 227.

<figure2.pdf, id=149, 794.97pt x 614.295pt>

File: figure2.pdf Graphic file (type pdf)

<use figure2.pdf>

Package pdftex.def Info: figure2.pdf used on input line 234.

(pdftex.def) Requested size: 244.11394pt x 188.62979pt.

<zUMIsFigure\_utilities.pdf, id=150, 867.24pt x 476.96884pt>

File: zUMIsFigure\_utilities.pdf Graphic file (type pdf)

<use zUMIsFigure\_utilities.pdf>

Package pdftex.def Info: zUMIsFigure\_utilities.pdf used on input line 242.

(pdftex.def) Requested size: 439.4021pt x 241.66429pt.

<figure4v3.pdf, id=151, 939.51pt x 505.89pt>

File: figure4v3.pdf Graphic file (type pdf)

<use figure4v3.pdf>

Package pdftex.def Info: figure4v3.pdf used on input line 251.

(pdftex.def) Requested size: 488.22787pt x 262.88676pt.

Package natbib Warning: Citation `Habib2017-sn' on page 5 undefined on input line 257.

Package natbib Warning: Citation `Satija2015-nn' on page 5 undefined on input line 257.

1  
2  
3  
4 ine 257.  
5  
6  
7 Package natbib Warning: Citation `Butler2017-kv' on page 5 undefined on  
8 input l  
9 ine 257.  
10  
11  
12 Package natbib Warning: Citation `Habib2017-sn' on page 5 undefined on  
13 input li  
14 ne 257.  
15  
16  
17  
18 Package natbib Warning: Citation `Habib2017-sn' on page 5 undefined on  
19 input li  
20 ne 257.  
21  
22 LaTeX Font Info: External font `cmex10' loaded for size  
23 (Font) <6> on input line 257.  
24 LaTeX Font Info: Font shape `T1/MerriweatherSans-TLF/m/n' will be  
25 (Font) scaled to size 6.0pt on input line 257.  
26  
27 Underfull \hbox (badness 10000) in paragraph at lines 279--279  
28 [ ]\T1/Merriweather-OsF/m/n/7 Open  
29 [ ]  
30  
31  
32 Underfull \hbox (badness 10000) in paragraph at lines 279--279  
33 [ ]\T1/Merriweather-OsF/m/n/7 UMI col-  
34 [ ]  
35  
36  
37 Underfull \hbox (badness 6775) in paragraph at lines 279--279  
38 [ ]\T1/Merriweather-OsF/m/n/7 BC de-tec-  
39 [ ]  
40  
41  
42 Underfull \hbox (badness 10000) in paragraph at lines 279--279  
43 [ ]\T1/Merriweather-OsF/m/n/7 Down-  
44 [ ]  
45  
46  
47  
48 Overfull \hbox (2.83214pt too wide) in paragraph at lines 279--279  
49 [ ]\T1/Merriweather-OsF/m/n/7 Compatible  
50 [ ]  
51  
52  
53 Underfull \hbox (badness 10000) in paragraph at lines 279--279  
54 \T1/Merriweather-OsF/m/n/7 UMI li-  
55 [ ]  
56  
57  
58 Underfull \hbox (badness 10000) in paragraph at lines 279--279  
59 \T1/Merriweather-OsF/m/n/7 brary  
60  
61  
62  
63  
64  
65

1  
2  
3  
4  
5  
6  
7  
8  
9  
10  
11  
12  
13  
14  
15  
16  
17  
18  
19  
20  
21  
22  
23  
24  
25  
26  
27  
28  
29  
30  
31  
32  
33  
34  
35  
36  
37  
38  
39  
40  
41  
42  
43  
44  
45  
46  
47  
48  
49  
50  
51  
52  
53  
54  
55  
56  
57  
58  
59  
60  
61  
62  
63  
64  
65

[]

Underfull \hbox (badness 10000) in paragraph at lines 279--279  
[]|\T1/Merriweather-OsF/m/n/7 Cell  
[]

Package natbib Warning: Citation `Zheng2017-zx' on page 5 undefined on  
input line 279.

Underfull \hbox (badness 10000) in paragraph at lines 279--279  
[]|\T1/Merriweather-OsF/m/n/7 Hamming  
[]

Package natbib Warning: Citation `Zheng2017-zx' on page 5 undefined on  
input line 279.

Package natbib Warning: Citation `Hashimshony2016-nk' on page 5 undefined  
on input line 279.

Underfull \hbox (badness 10000) in paragraph at lines 279--279  
[]|\T1/Merriweather-OsF/m/n/7 identity  
[]

Package natbib Warning: Citation `Grun2014-ez' on page 5 undefined on  
input line 279.

Package natbib Warning: Citation `Hashimshony2016-nk' on page 5 undefined  
on input line 279.

Package natbib Warning: Citation `Petukhov2017-ui' on page 5 undefined on  
input line 279.

Underfull \hbox (badness 10000) in paragraph at lines 279--279  
[]|\T1/Merriweather-OsF/m/n/7 TopHat2  
[]

Underfull \hbox (badness 10000) in paragraph at lines 279--279

1  
2  
3  
4  
5  
6  
7  
8  
9  
10  
11  
12  
13  
14  
15  
16  
17  
18  
19  
20  
21  
22  
23  
24  
25  
26  
27  
28  
29  
30  
31  
32  
33  
34  
35  
36  
37  
38  
39  
40  
41  
42  
43  
44  
45  
46  
47  
48  
49  
50  
51  
52  
53  
54  
55  
56  
57  
58  
59  
60  
61  
62  
63  
64  
65

[ ]|\T1/Merriweather-OsF/m/n/7 WL,top-  
[ ]

Package natbib Warning: Citation `Macosko2015-yd' on page 5 undefined on  
input  
line 279.

Package natbib Warning: Citation `Klein2015-mj' on page 5 undefined on  
input li  
ne 279.

Package natbib Warning: Citation `Zheng2017-zx' on page 5 undefined on  
input li  
ne 279.

Underfull \hbox (badness 10000) in paragraph at lines 279--279  
[ ]|\T1/Merriweather-OsF/m/n/7 Drop-seq-  
[ ]

Package natbib Warning: Citation `Macosko2015-yd' on page 5 undefined on  
input  
line 279.

Underfull \hbox (badness 10000) in paragraph at lines 279--279  
[ ]|\T1/Merriweather-OsF/m/n/7 Hamming  
[ ]

Package natbib Warning: Citation `Macosko2015-yd' on page 5 undefined on  
input  
line 279.

Package natbib Warning: Citation `Soumillon2014-hd' on page 5 undefined  
on inpu  
t line 279.

Package natbib Warning: Citation `Hashimshony2016-nk' on page 5 undefined  
on in  
put line 279.

Package natbib Warning: Citation `Tian2017-eh' on page 5 undefined on  
input lin  
e 279.

1  
2  
3  
4  
5  
6  
7  
8  
9  
10  
11  
12  
13  
14  
15  
16  
17  
18  
19  
20  
21  
22  
23  
24  
25  
26  
27  
28  
29  
30  
31  
32  
33  
34  
35  
36  
37  
38  
39  
40  
41  
42  
43  
44  
45  
46  
47  
48  
49  
50  
51  
52  
53  
54  
55  
56  
57  
58  
59  
60  
61  
62  
63  
64  
65

Underfull \hbox (badness 10000) in paragraph at lines 279--279  
[ ]\T1/Merriweather-OsF/m/n/7 Hamming  
[ ]

Package natbib Warning: Citation `Grun2014-ez' on page 5 undefined on  
input line 279.

Package natbib Warning: Citation `Jaitin2014-na' on page 5 undefined on  
input line 279.

Package natbib Warning: Citation `Soumillon2014-hd' on page 5 undefined  
on input line 279.

Package natbib Warning: Citation `Macosko2015-yd' on page 5 undefined on  
input line 279.

Package natbib Warning: Citation `Svensson2017-gy' on page 5 undefined on  
input line 279.

Underfull \hbox (badness 10000) in paragraph at lines 279--279  
[ ]\T1/Merriweather-OsF/m/n/7 WL,top-  
[ ]

Package natbib Warning: Citation `Soumillon2014-hd' on page 5 undefined  
on input line 279.

Package natbib Warning: Citation `Grun2014-ez' on page 5 undefined on  
input line 279.

Package natbib Warning: Citation `Islam2014-kv' on page 5 undefined on  
input line 279.

Package natbib Warning: Citation `Jaitin2014-na' on page 5 undefined on  
input line 279.

1  
2  
3  
4  
5  
6  
7  
8  
9  
10  
11  
12  
13  
14  
15  
16  
17  
18  
19  
20  
21  
22  
23  
24  
25  
26  
27  
28  
29  
30  
31  
32  
33  
34  
35  
36  
37  
38  
39  
40  
41  
42  
43  
44  
45  
46  
47  
48  
49  
50  
51  
52  
53  
54  
55  
56  
57  
58  
59  
60  
61  
62  
63  
64  
65

Package natbib Warning: Citation `Macosko2015-yd' on page 5 undefined on input line 279.

Package natbib Warning: Citation `Klein2015-mj' on page 5 undefined on input line 279.

Package natbib Warning: Citation `Zheng2017-zx' on page 5 undefined on input line 279.

Package natbib Warning: Citation `Smith2017-xd' on page 5 undefined on input line 279.

Underfull \hbox (badness 10000) in paragraph at lines 279--279  
[ ]\T1/Merriweather-OsF/m/n/7 network-  
[ ]

Package natbib Warning: Citation `Soumillon2014-hd' on page 5 undefined on input line 279.

Package natbib Warning: Citation `Klein2015-mj' on page 5 undefined on input line 279.

Underfull \hbox (badness 10000) in paragraph at lines 279--279  
[ ]\T1/Merriweather-OsF/m/n/7 Hamming  
[ ]

Underfull \hbox (badness 10000) in paragraph at lines 279--279  
[ ]\T1/Merriweather-OsF/m/n/7 A,WL,top-  
[ ]

Package natbib Warning: Citation `Soumillon2014-hd' on page 5 undefined on input line 279.

Package natbib Warning: Citation `Grun2014-ez' on page 5 undefined on input line 279.

1  
2  
3  
4  
5  
6  
7  
8  
9  
10  
11  
12  
13  
14  
15  
16  
17  
18  
19  
20  
21  
22  
23  
24  
25  
26  
27  
28  
29  
30  
31  
32  
33  
34  
35  
36  
37  
38  
39  
40  
41  
42  
43  
44  
45  
46  
47  
48  
49  
50  
51  
52  
53  
54  
55  
56  
57  
58  
59  
60  
61  
62  
63  
64  
65

Package natbib Warning: Citation `Islam2014-kv' on page 5 undefined on input line 279.

Package natbib Warning: Citation `Jaitin2014-na' on page 5 undefined on input line 279.

Package natbib Warning: Citation `Macosko2015-yd' on page 5 undefined on input line 279.

Package natbib Warning: Citation `Hashimshony2016-nk' on page 5 undefined on input line 279.

Package natbib Warning: Citation `Hochgerner2017-wt' on page 5 undefined on input line 279.

Package natbib Warning: Citation `Habib2017-sn' on page 5 undefined on input line 279.

Package natbib Warning: Citation `Rosenberg2018-aj' on page 5 undefined on input line 279.

Package natbib Warning: Citation `Zheng2017-zx' on page 5 undefined on input line 279.

LaTeX Warning: `h' float specifier changed to `ht'.

AED: lastpage setting LastPage

Overfull \hbox (253.11394pt too wide) has occurred while \output is active

[][]  
[]

[5

```

1
2
3
4 ]
5 Overfull \hbox (253.11394pt too wide) has occurred while \output is
6 active
7 [][]
8 []
9
10 [6 <./zUMI_pipeline-eps-converted-to.pdf> <./figure2.pdf>]
11 Overfull \hbox (253.11394pt too wide) has occurred while \output is
12 active
13 [][]
14 []
15
16 [7 <./zUMIsFigure_utilities.pdf>]
17 Overfull \hbox (253.11394pt too wide) has occurred while \output is
18 active
19 [][]
20 []
21
22
23 [8 <./figure4v3.pdf>]
24
25 Package natbib Warning: There were undefined citations.
26
27 Package atveryend Info: Empty hook `BeforeClearDocument' on input line
28 283.
29 Package atveryend Info: Empty hook `AfterLastShipout' on input line 283.
30 (./main.aux)
31 Package atveryend Info: Executing hook `AtVeryEndDocument' on input line
32 283.
33 Package atveryend Info: Executing hook `AtEndAfterFileList' on input line
34 283.
35 Package rerunfilecheck Info: File `main.out' has not changed.
36 (rerunfilecheck) Checksum:
37 2535D27E612411330F05046A086B7C4B;1574.
38
39
40 LaTeX Font Warning: Size substitutions with differences
41 (Font) up to 1.0pt have occurred.
42
43 )
44 Here is how much of TeX's memory you used:
45 24718 strings out of 493027
46 457134 string characters out of 6137679
47 620786 words of memory out of 5000000
48 27762 multiletter control sequences out of 15000+600000
49 68206 words of font info for 205 fonts, out of 8000000 for 9000
50 1141 hyphenation exceptions out of 8191
51 64i,12n,102p,10407b,865s stack positions out of
52 5000i,500n,10000p,200000b,80000s
53 {c:/TeXLive/2015/texmf-dist/fonts/enc/dvips/lm/lm-
54 ec.enc}{c:/TeXLive/2015/tex
55 mf-
56 dist/fonts/enc/dvips/merriweather/mwth_jnnjab.enc}{c:/TeXLive/2015/texmf-
57 dis
58 t/fonts/enc/dvips/merriweather/mwth_ywgpba.enc}<c:/TeXLive/2015/texmf-
59 dist/font
60
61
62
63
64
65

```



1  
2  
3  
4  
5  
6  
7  
8  
9  
10  
11  
12  
13  
14  
15  
16  
17  
18  
19  
20  
21  
22  
23  
24  
25  
26  
27  
28  
29  
30  
31  
32  
33  
34  
35  
36  
37  
38  
39  
40  
41  
42  
43  
44  
45  
46  
47  
48  
49  
50  
51  
52  
53  
54  
55  
56  
57  
58  
59  
60  
61  
62  
63  
64  
65

```
s/type1/sorkin/merriweather/Merriweather-Bold.pfb><c:/TeXLive/2015/texmf-  
dist/f  
onts/type1/sorkin/merriweather/Merriweather-  
BoldIt.pfb><c:/TeXLive/2015/texmf-d  
ist/fonts/type1/sorkin/merriweather/Merriweather-  
Italic.pfb><c:/TeXLive/2015/te  
xmf-dist/fonts/type1/sorkin/merriweather/Merriweather-  
Regular.pfb><c:/TeXLive/2  
015/texmf-  
dist/fonts/type1/public/amsfonts/cm/cmsy7.pfb><c:/TeXLive/2015/texmf-  
dist/fonts/type1/public/amsfonts/euler/eusm7.pfb><c:/TeXLive/2015/texmf-  
dist/fo  
nts/type1/public/lm/lmtt8.pfb>  
Output written on main.pdf (8 pages, 4895790 bytes).  
PDF statistics:  
 301 PDF objects out of 1000 (max. 8388607)  
 234 compressed objects within 3 object streams  
 38 named destinations out of 1000 (max. 500000)  
 51909 words of extra memory for PDF output out of 61914 (max. 10000000)
```



Click here to access/download  
**Supplementary Material**  
zumis\_fast\_flexible.pdf



Supplement: giy059_giga-d-17-00271_revision_3.pdf [file giy059_giga-d-17-00271_revision_3.pdf]
